# Supplementary material for: Preparing for Life: Plasma Proteome Changes and Immune System Development During the First Week of Human Life
Source: PubMed Central journal article supplement (PMC7732455; doi:10.3389/fimmu.2020.578505), 2020-10-20
Supplement: DataSheet_1.pdf [file DataSheet_1.pdf]

## Supplementary Material

### 1 Supplementary Data

All data are publicly available. The mass spectrometry RAW data and search results have been deposited to the ProteomeXchange consortium via the PRIDE partner repository, and is available with the data set identifier PXD019817 as well as archived on ImmPort (<https://immport.niaid.nih.gov/home>) under accession numbers SDY1256 and SDY1412. The transcriptomics data have been submitted to the NCBI Gene Expression Omnibus under accession numbers GSE111404 and GSE123070.

### 2 Supplementary Figures and Tables

#### 2.1 Supplementary Figures

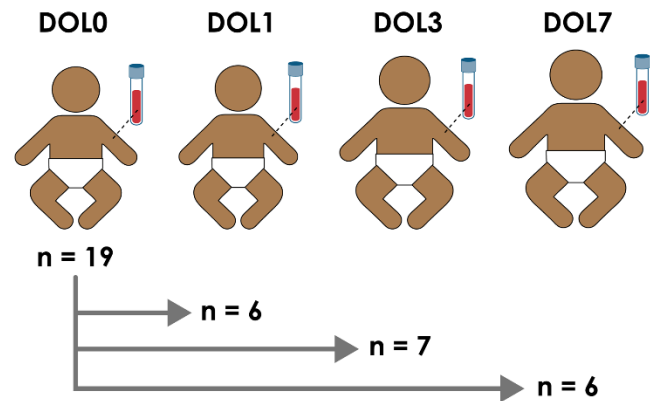

**Supplementary Figure 1.** Study design and number of enrolled newborns in the validation cohort from Papua New Guinea (PNG), Australasia.

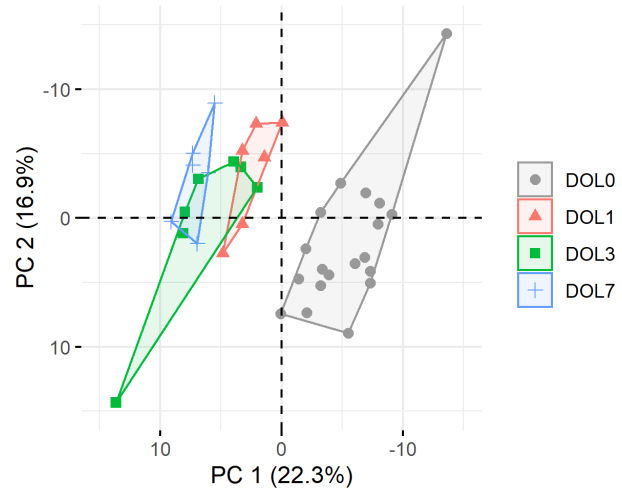

**Supplementary Figure 2.** Unsupervised principal component analysis (PCA) plot of all quantifiable proteins in the validation cohort, demonstrates that the largest variance in the dataset, principal component 1 (PC1), separates samples based on DOL, similarly to the main cohort. Explained variance given as percentages.

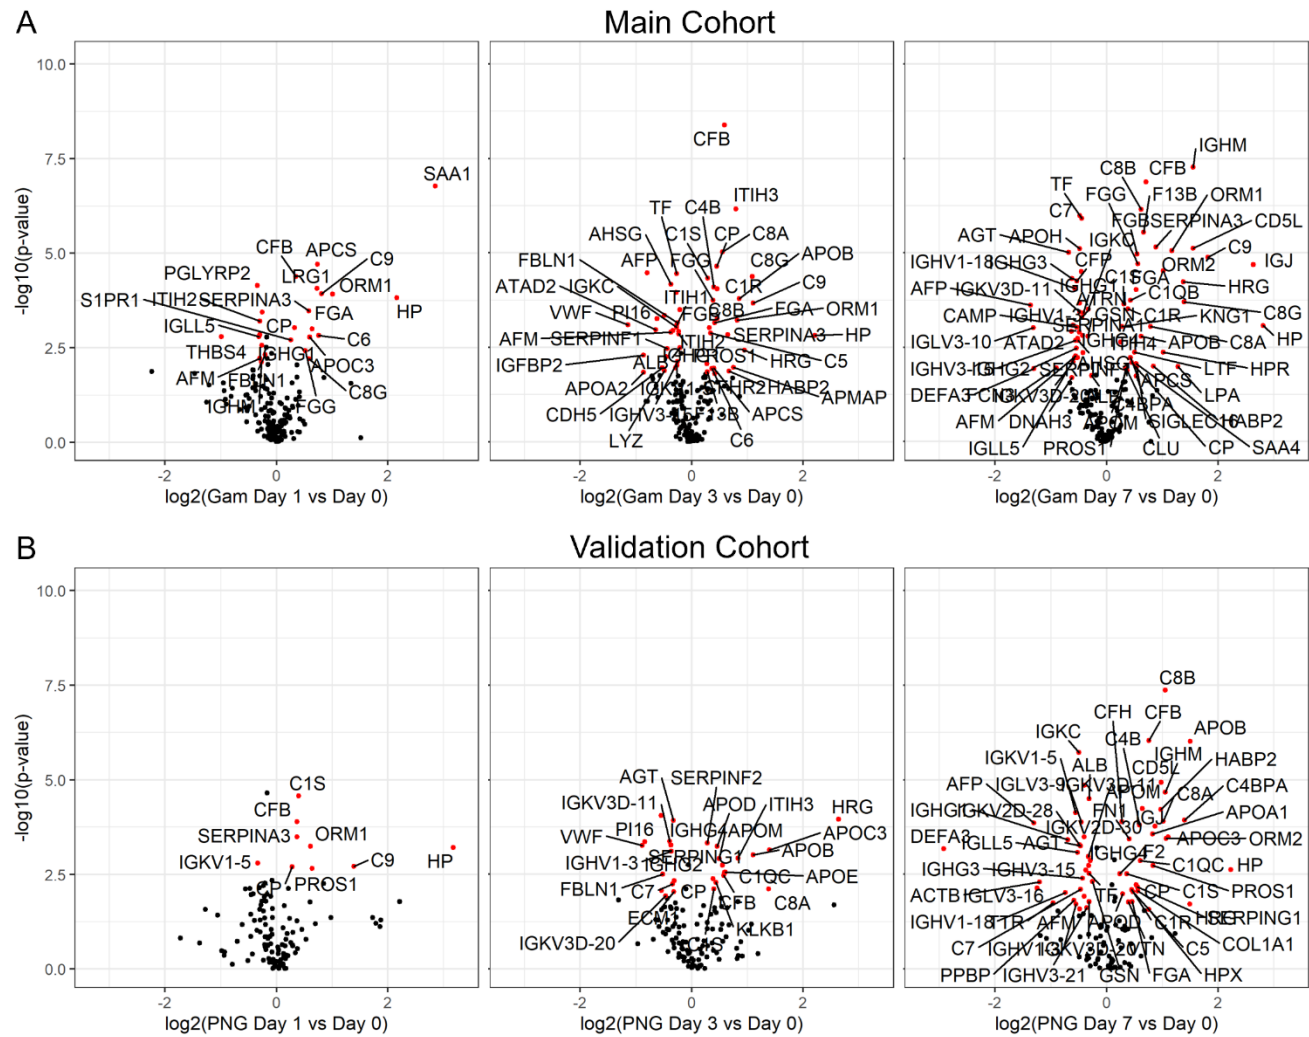

**Supplementary Figure 3.** Volcano plots of all quantifiable proteins in A) the main and B) validation cohort. Significantly regulated proteins ( $q$ -value < 0.05, absolute  $\log_2[\text{fold change vs DOL0}] > 0.2$ ) are marked with red and given gene names when available.

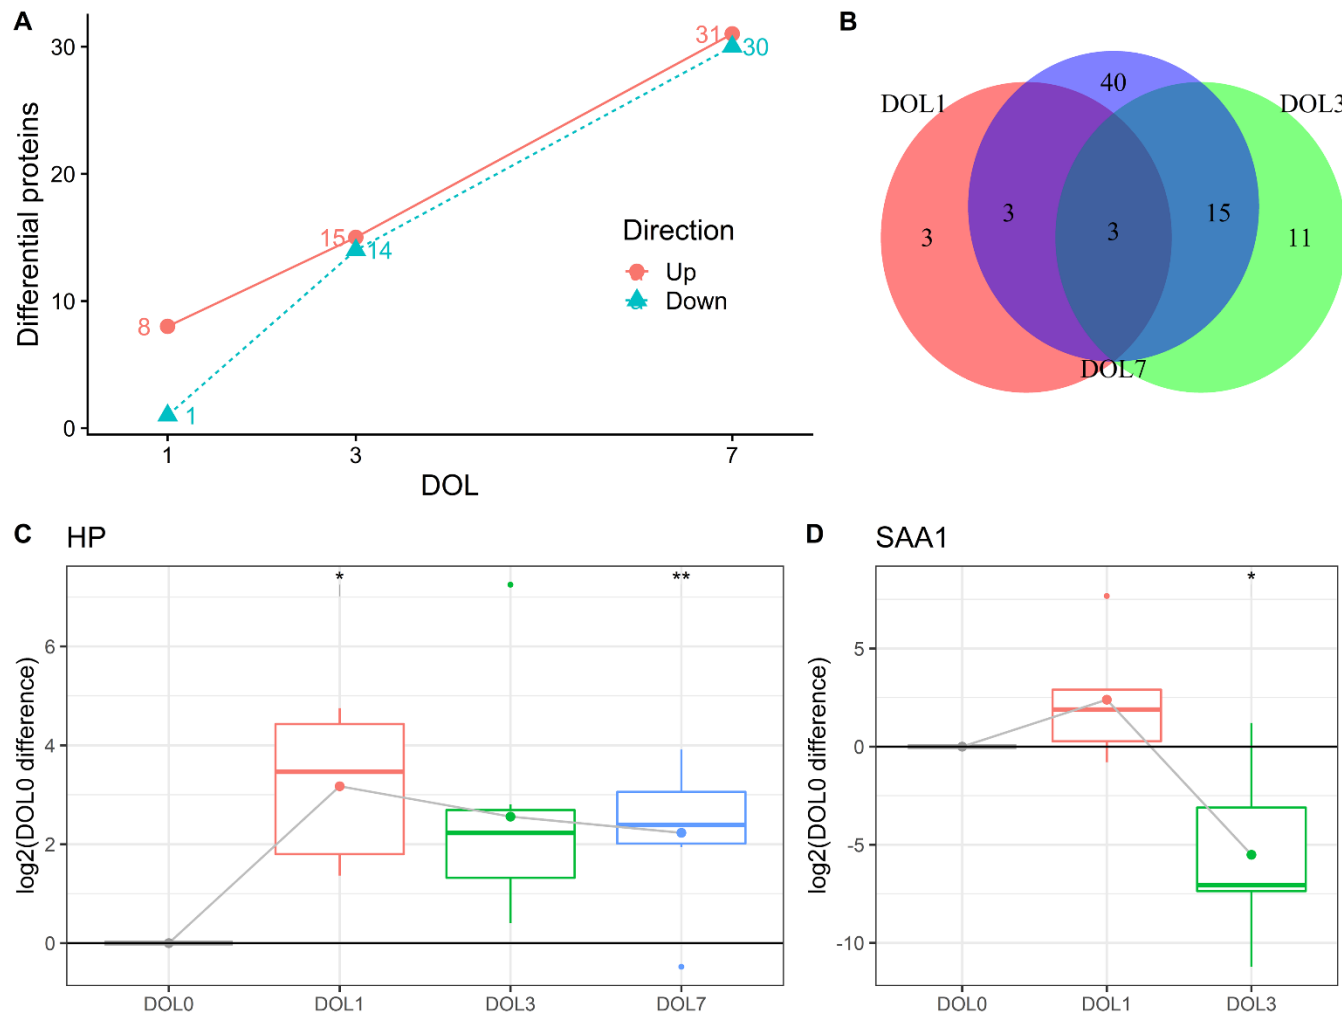

**Supplementary Figure 4.** Validation cohort. Differentially regulated plasma proteins (q-value < 0.05) compared to day of life (DOL) 0. A) We identified a robust trajectory of differentially expressed proteins over the first week of life. B) Overlap of regulated proteins. Protein

regulations of C) Haptoglobin (HP), D) Serum amyloid A1 (SAA1) normalized to DOL0, with mean abundance difference indicated by dots and solid line. q-value \* < 0.05, \*\*: < 0.01, \*\*\*: < 0.001..

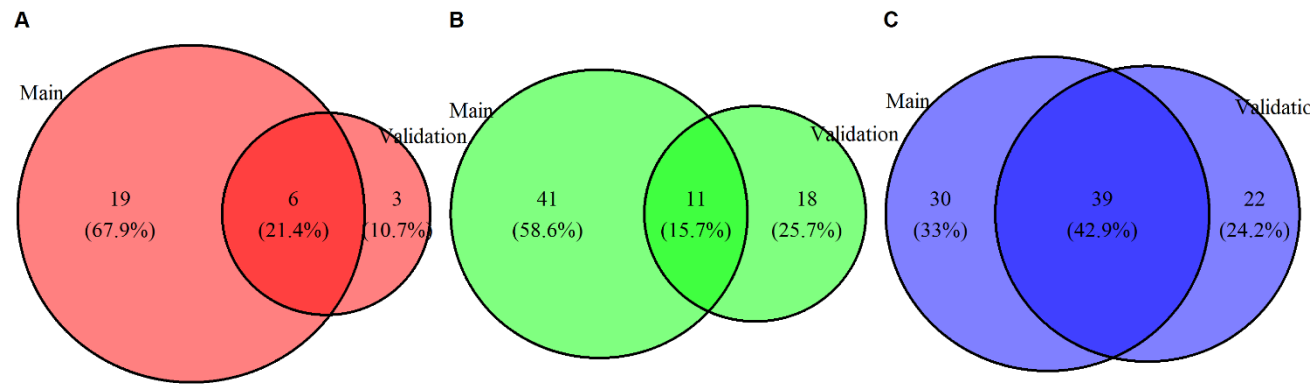

**Supplementary Figure 5.** Overlap in significantly differentiated proteins in the main and validation cohorts on A) DOL1, B) DOL3, and C) DOL7, compared to DOL0.

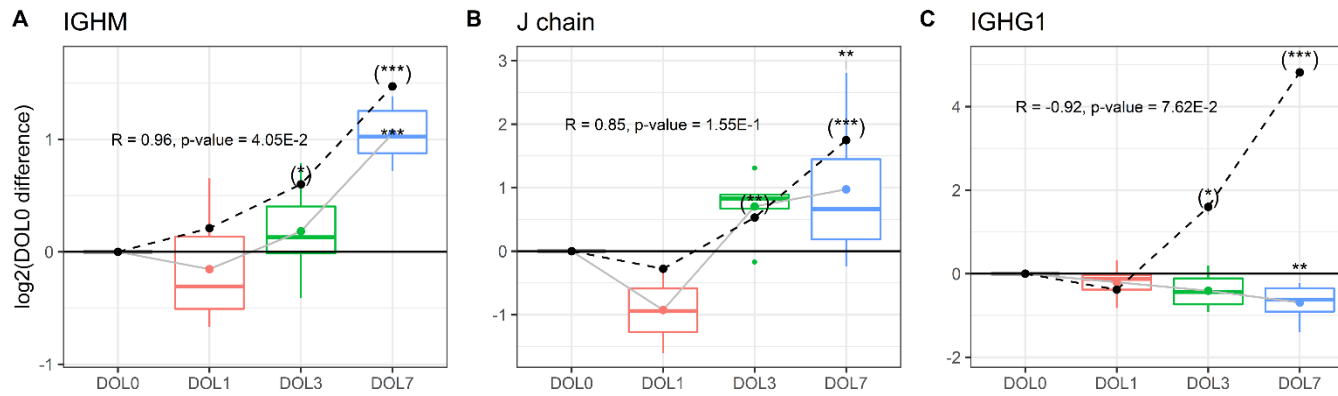

**Supplementary Figure 6.** Validation cohort. Protein and mRNA levels (dotted line) of A) IgM, B) J chain, C) IgG1 across the first week of life compared to DOL0, with mean abundance difference indicated by dots and solid line. Protein to RNA correlation and p-value given. Statistics compared to DOL0: q-value protein (or mRNA) < 0.05: \*(\*), < 0.01: \*\* (\*\*), < 0.001: \*\*\* (\*\*\*)).

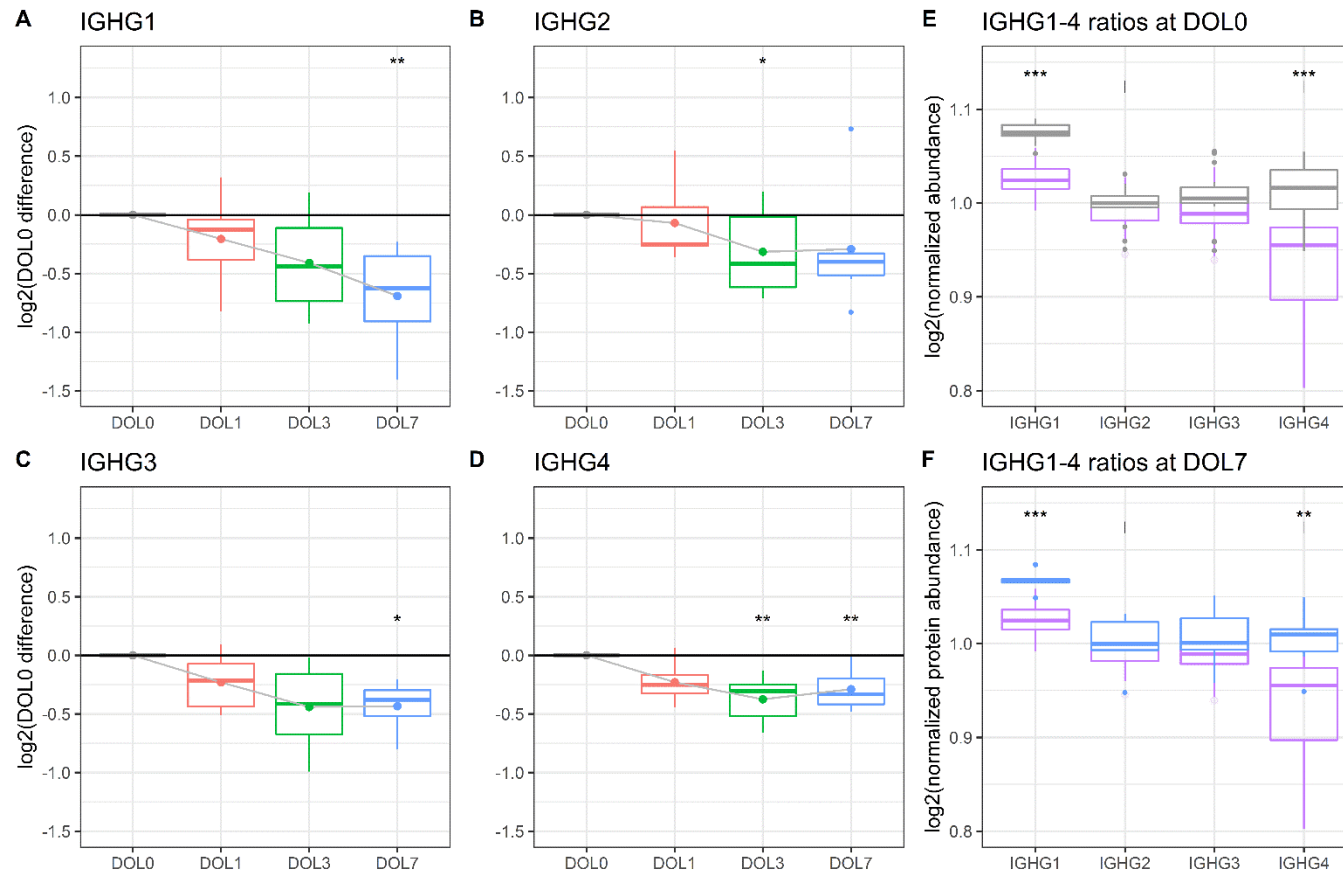

**Supplementary Figure 7.** Validation cohort. Protein levels of A-D) IgG1-4 across the first week of life as compared to DOL0, with mean abundance difference indicated by dots and solid line. E) Comparison of the ratios of IgG1-4 normalized to IgG2 between adult-levels (purple) and newborn-levels at DOL0 (grey), or F) DOL7 (blue). Statistics A-D (E, F): q-value < 0.05: \*, < 0.01: \*\*, < 0.001: \*\*\*.



## 2.2 Supplementary Tables

| FC<br>log2 | Protein                                      | Gene<br>Name | UPID   | p-value  | q-value  |
|------------|----------------------------------------------|--------------|--------|----------|----------|
| 2.85       | Serum amyloid A-1 protein                    | SAA1         | P0DJ18 | 1.68E-07 | 3.00E-05 |
| 2.16       | Haptoglobin                                  | HP           | P00738 | 1.48E-04 | 3.30E-03 |
| 1.01       | Alpha-1-acid glycoprotein 1                  | ORM1         | P02763 | 1.21E-04 | 3.07E-03 |
| 0.81       | Complement component C9                      | C9           | P02748 | 1.18E-04 | 3.07E-03 |
| 0.76       | Complement component C6                      | C6           | P13671 | 1.48E-03 | 1.54E-02 |
| 0.74       | Serum amyloid P-component                    | APCS         | P02743 | 1.94E-05 | 1.73E-03 |
| 0.73       | Leucine-rich alpha-2-glycoprotein            | LRG1         | P02750 | 8.38E-05 | 2.99E-03 |
| 0.64       | Fibrinogen alpha chain                       | FGA          | P02671 | 9.88E-04 | 1.35E-02 |
| 0.59       | Apolipoprotein C-III                         | APOC3        | P02656 | 1.65E-03 | 1.54E-02 |
| 0.58       | Complement component C8 gamma chain          | C8G          | P07360 | 6.22E-03 | 3.95E-02 |
| 0.58       | Alpha-1-antichymotrypsin                     | SERPINA3     | P01011 | 3.30E-04 | 6.33E-03 |
| 0.52       | Fibrinogen gamma chain                       | FGG          | P02679 | 3.73E-03 | 2.89E-02 |
| 0.35       | Complement factor B                          | CFB          | P00751 | 4.16E-05 | 2.47E-03 |
| 0.33       | Ceruloplasmin                                | CP           | P00450 | 9.27E-04 | 1.35E-02 |
| 0.26       | Sphingosine 1-phosphate receptor 1           | S1PR1        | P21453 | 1.97E-03 | 1.75E-02 |
| -0.20      | Fibulin-1                                    | FBLN1        | P23142 | 4.84E-03 | 3.44E-02 |
| -0.26      | Immunoglobulin kappa variable 3-15           | IGKV3-15     | P01624 | 3.56E-04 | 6.33E-03 |
| -0.26      | Ig gamma-1 chain C region                    | IGHG1        | P01857 | 2.68E-03 | 2.27E-02 |
| -0.27      | Ig mu chain C region                         | IGHM         | P01871 | 7.44E-03 | 4.57E-02 |
| -0.30      | Inter-alpha-trypsin inhibitor heavy chain H2 | ITIH2        | P19823 | 6.27E-04 | 1.01E-02 |
| -0.30      | Immunoglobulin lambda variable 2-8           | IGLV2-8      | P01709 | 1.42E-03 | 1.54E-02 |
| -0.30      | Afamin                                       | AFM          | P43652 | 6.06E-03 | 3.95E-02 |
| -0.31      | Immunoglobulin lambda-like polypeptide 5     | IGLL5        | B9A064 | 1.60E-03 | 1.54E-02 |
| -0.34      | N-acetylmuramoyl-L-alanine amidase           | PGLYRP2      | Q96PD5 | 7.08E-05 | 2.99E-03 |
| -0.99      | Thrombospondin-4                             | THBS4        | P35443 | 1.61E-03 | 1.54E-02 |

**Supplementary Table 1.** Significant proteins in the main cohort DOL1 vs DOL0 (q-value < 0.05).

| FC<br>log2 | Protein                                      | Gene<br>name | UPID   | p-value  | q-value  |
|------------|----------------------------------------------|--------------|--------|----------|----------|
| 2.22       | Haptoglobin                                  | HP           | P00738 | 1.52E-03 | 7.59E-03 |
| 1.11       | Complement component C9                      | C9           | P02748 | 2.13E-04 | 2.42E-03 |
| 1.09       | Complement component C8 gamma chain          | C8G          | P07360 | 4.21E-05 | 9.77E-04 |
| 0.95       | Histidine-rich glycoprotein                  | HRG          | P04196 | 3.77E-03 | 1.73E-02 |
| 0.85       | Apolipoprotein B-100                         | APOB         | P04114 | 1.62E-04 | 2.11E-03 |
| 0.82       | Alpha-1-acid glycoprotein 1                  | ORM1         | P02763 | 6.02E-04 | 5.11E-03 |
| 0.80       | Inter-alpha-trypsin inhibitor heavy chain H3 | ITIH3        | Q06033 | 6.81E-07 | 5.79E-05 |
| 0.75       | Adipocyte plasma membrane-associated protein | APMAP        | Q9HDC9 | 1.08E-02 | 4.08E-02 |
| 0.67       | Hyaluronan-binding protein 2                 | HABP2        | Q14520 | 1.35E-02 | 4.58E-02 |
| 0.65       | Alpha-1-antichymotrypsin                     | SERPINA3     | P01011 | 1.44E-03 | 7.42E-03 |
| 0.59       | Complement factor B                          | CFB          | P00751 | 4.08E-09 | 6.94E-07 |
| 0.55       | Complement component C8 alpha chain          | C8A          | P07357 | 9.43E-06 | 5.34E-04 |
| 0.46       | Complement component C8 beta chain           | C8B          | P07358 | 5.44E-04 | 4.94E-03 |
| 0.46       | Complement C1r subcomponent                  | C1R          | P00736 | 8.93E-05 | 1.38E-03 |
| 0.45       | Ceruloplasmin                                | CP           | P00450 | 2.25E-05 | 9.57E-04 |
| 0.41       | Complement factor H-related protein 2        | CFHR2        | P36980 | 1.54E-02 | 4.95E-02 |
| 0.41       | Fibrinogen alpha chain                       | FGA          | P02671 | 7.06E-04 | 5.47E-03 |
| 0.40       | Complement C4-B                              | C4B          | POCOL5 | 7.97E-05 | 1.36E-03 |
| 0.40       | Serum amyloid P-component                    | APCS         | P02743 | 1.13E-02 | 4.08E-02 |
| 0.38       | Fibrinogen gamma chain                       | FGG          | P02679 | 1.80E-04 | 2.18E-03 |
| 0.37       | Complement component C6                      | C6           | P13671 | 1.15E-02 | 4.09E-02 |
| 0.34       | Complement C5                                | C5           | P01031 | 1.32E-03 | 7.23E-03 |
| 0.32       | Fibrinogen beta chain                        | FGB          | P02675 | 9.56E-04 | 6.25E-03 |
| 0.29       | Complement C1s subcomponent                  | C1S          | P09871 | 4.60E-05 | 9.77E-04 |
| 0.28       | Coagulation factor XIII B chain              | F13B         | P05160 | 1.40E-02 | 4.66E-02 |
| 0.28       | Vitamin K-dependent protein S                | PROS1        | P07225 | 8.46E-03 | 3.43E-02 |
| -0.21      | Serum albumin                                | ALB          | P02768 | 3.22E-03 | 1.57E-02 |

|       |                                               |           |            |          |          |
|-------|-----------------------------------------------|-----------|------------|----------|----------|
| -0.21 | Immunoglobulin lambda variable 1-47           | IGLV1-47  | P01700     | 3.16E-04 | 3.36E-03 |
| -0.23 | Inter-alpha-trypsin inhibitor heavy chain H2  | ITIH2     | P19823     | 1.20E-03 | 7.06E-03 |
| -0.23 | Ig gamma-1 chain C region                     | IGHG1     | P01857     | 1.39E-03 | 7.36E-03 |
| -0.25 | Immunoglobulin heavy variable 3-15            | IGHV3-15  | A0A0B4J1V0 | 7.61E-03 | 3.15E-02 |
| -0.26 | Fibulin-1                                     | FBLN1     | P23142     | 7.08E-04 | 5.47E-03 |
| -0.26 | Immunoglobulin kappa variable 1-5             | IGKV1-5   | P01602     | 9.50E-03 | 3.75E-02 |
| -0.27 | Ig kappa chain C region                       | IGKC      | P01834     | 9.29E-04 | 6.25E-03 |
| -0.27 | Inter-alpha-trypsin inhibitor heavy chain H1  | ITIH1     | P19827     | 8.25E-04 | 5.85E-03 |
| -0.27 | Serotransferrin                               | TF        | P02787     | 3.51E-05 | 9.77E-04 |
| -0.28 | Immunoglobulin kappa variable 3-20            | IGKV3-20  | P01619     | 1.12E-04 | 1.58E-03 |
| -0.29 | Immunoglobulin lambda variable 1-51           | IGLV1-51  | P01701     | 1.10E-02 | 4.08E-02 |
| -0.33 | Immunoglobulin kappa variable 1-33            | IGKV1-33  | P01594     | 1.15E-03 | 6.97E-03 |
| -0.37 | Alpha-2-HS-glycoprotein                       | AHSG      | P02765     | 6.77E-05 | 1.28E-03 |
| -0.37 | Afamin                                        | AFM       | P43652     | 1.25E-03 | 7.07E-03 |
| -0.44 | Pigment epithelium-derived factor             | SERPINF1  | P36955     | 3.41E-03 | 1.61E-02 |
| -0.45 | Immunoglobulin heavy variable 1-2             | IGHV1-2   | P23083     | 5.58E-03 | 2.37E-02 |
| -0.49 | Immunoglobulin heavy variable 3-43D           | IGHV3-43D | P0DP04     | 4.55E-04 | 4.55E-03 |
| -0.49 | Lysozyme C                                    | LYZ       | P61626     | 1.31E-02 | 4.53E-02 |
| -0.53 | Cadherin-5                                    | CDH5      | P33151     | 1.10E-02 | 4.08E-02 |
| -0.62 | Peptidase inhibitor 16                        | PI16      | Q6UXB8     | 5.52E-04 | 4.94E-03 |
| -0.64 | ATPase family AAA domain-containing protein 2 | ATAD2     | Q6PL18     | 1.09E-03 | 6.84E-03 |
| -0.80 | Alpha-fetoprotein                             | AFP       | P02771     | 3.35E-05 | 9.77E-04 |
| -0.86 | Insulin-like growth factor-binding protein 2  | IGFBP2    | P18065     | 5.13E-03 | 2.23E-02 |
| -0.87 | Apolipoprotein A-II                           | APOA2     | P02652     | 1.44E-02 | 4.72E-02 |
| -1.15 | von Willebrand factor                         | VWF       | P04275     | 7.95E-04 | 5.85E-03 |

**Supplementary Table 2.** Significantly differentiated proteins in the main cohort DOL3 vs DOL0 (q-value < 0.05).

| FC log2 | Protein                               | Gene name | UPID   | p-value  | q-value  |
|---------|---------------------------------------|-----------|--------|----------|----------|
| 2.81    | Haptoglobin                           | HP        | P00738 | 8.35E-04 | 4.10E-03 |
| 2.63    | Immunoglobulin J chain                | IGJ       | P01591 | 2.06E-05 | 2.29E-04 |
| 1.82    | Complement component C9               | C9        | P02748 | 1.30E-05 | 1.67E-04 |
| 1.55    | Ig mu chain C region                  | IGHM      | P01871 | 5.36E-08 | 8.94E-06 |
| 1.55    | CD5 antigen-like                      | CD5L      | O43866 | 7.55E-06 | 1.45E-04 |
| 1.39    | Complement component C8 gamma chain   | C8G       | P07360 | 2.00E-04 | 1.39E-03 |
| 1.38    | Histidine-rich glycoprotein           | HRG       | P04196 | 5.82E-05 | 4.86E-04 |
| 1.28    | Apolipoprotein(a)                     | LPA       | P08519 | 1.03E-02 | 2.87E-02 |
| 1.17    | Alpha-1-acid glycoprotein 1           | ORM1      | P02763 | 8.71E-06 | 1.46E-04 |
| 1.02    | Haptoglobin-related protein           | HPR       | P00739 | 4.30E-03 | 1.44E-02 |
| 1.02    | Alpha-1-acid glycoprotein 2           | ORM2      | P19652 | 3.01E-05 | 3.04E-04 |
| 0.89    | Alpha-1-antichymotrypsin              | SERPINA3  | P01011 | 7.03E-06 | 1.45E-04 |
| 0.84    | Hyaluronan-binding protein 2          | HABP2     | Q14520 | 9.91E-03 | 2.80E-02 |
| 0.79    | Complement component C8 alpha chain   | C8A       | P07357 | 8.85E-04 | 4.15E-03 |
| 0.71    | Complement factor B                   | CFB       | P00751 | 1.32E-07 | 1.11E-05 |
| 0.67    | Coagulation factor XIII B chain       | F13B      | P05160 | 2.88E-06 | 8.01E-05 |
| 0.62    | Apolipoprotein B-100                  | APOB      | P04114 | 1.61E-03 | 6.28E-03 |
| 0.62    | Complement component C8 beta chain    | C8B       | P07358 | 7.09E-07 | 3.94E-05 |
| 0.56    | Fibrinogen gamma chain                | FGG       | P02679 | 1.96E-05 | 2.29E-04 |
| 0.55    | Fibrinogen beta chain                 | FGB       | P02675 | 1.07E-05 | 1.49E-04 |
| 0.54    | Sialic acid-binding Ig-like lectin 16 | SIGLEC16  | A6NMB1 | 1.06E-02 | 2.90E-02 |
| 0.53    | C4b-binding protein alpha chain       | C4BPA     | P04003 | 1.83E-02 | 4.44E-02 |
| 0.53    | Serum amyloid A-4 protein             | SAA4      | P35542 | 8.66E-03 | 2.49E-02 |
| 0.53    | Fibrinogen alpha chain                | FGA       | P02671 | 9.49E-05 | 7.21E-04 |
| 0.50    | Lactotransferrin                      | LTF       | P02788 | 4.31E-03 | 1.44E-02 |
| 0.45    | Ceruloplasmin                         | CP        | P00450 | 7.96E-03 | 2.33E-02 |
| 0.43    | Complement C1q subcomponent subunit B | C1QB      | P02746 | 1.80E-04 | 1.31E-03 |

|       |                                              |          |            |          |          |
|-------|----------------------------------------------|----------|------------|----------|----------|
| 0.43  | Serum amyloid P-component                    | APCS     | P02743     | 5.87E-03 | 1.83E-02 |
| 0.38  | Complement C1r subcomponent                  | C1R      | P00736     | 3.06E-04 | 1.81E-03 |
| 0.37  | Clusterin                                    | CLU      | P10909     | 1.30E-02 | 3.29E-02 |
| 0.37  | Apolipoprotein M                             | APOM     | O95445     | 1.15E-02 | 3.01E-02 |
| 0.34  | Vitamin K-dependent protein S                | PROS1    | P07225     | 1.17E-02 | 3.01E-02 |
| 0.31  | Complement C1s subcomponent                  | C1S      | P09871     | 2.23E-04 | 1.43E-03 |
| 0.28  | Kininogen-1                                  | KNG1     | P01042     | 8.94E-04 | 4.15E-03 |
| 0.25  | Inter-alpha-trypsin inhibitor heavy chain H4 | ITIH4    | Q14624     | 2.28E-03 | 8.11E-03 |
| -0.27 | Serum albumin                                | ALB      | P02768     | 1.78E-02 | 4.38E-02 |
| -0.33 | Ig kappa chain C region                      | IGKC     | P01834     | 3.14E-04 | 1.81E-03 |
| -0.34 | Gelsolin                                     | GSN      | P06396     | 1.62E-03 | 6.28E-03 |
| -0.42 | Ig gamma-1 chain C region                    | IGHG1    | P01857     | 3.86E-04 | 2.08E-03 |
| -0.42 | Pigment epithelium-derived factor            | SERPINF1 | P36955     | 4.41E-03 | 1.44E-02 |
| -0.43 | Alpha-1-antitrypsin                          | SERPINA1 | P01009     | 1.56E-03 | 6.28E-03 |
| -0.44 | Attractin                                    | ATRN     | O75882     | 5.17E-04 | 2.70E-03 |
| -0.45 | Serotransferrin                              | TF       | P02787     | 1.23E-06 | 4.11E-05 |
| -0.45 | Immunoglobulin kappa variable 3-20           | IGKV3-20 | P01619     | 3.10E-05 | 3.04E-04 |
| -0.48 | Immunoglobulin kappa variable 3-11           | IGKV3-11 | P04433     | 3.67E-04 | 2.04E-03 |
| -0.48 | Complement component C7                      | C7       | P10643     | 1.03E-06 | 4.11E-05 |
| -0.48 | Beta-2-glycoprotein 1                        | APOH     | P02749     | 7.80E-06 | 1.45E-04 |
| -0.48 | Ig kappa chain V-III region POM              | IGKV3-15 | P01624     | 2.16E-04 | 1.43E-03 |
| -0.49 | Immunoglobulin lambda constant 2             | IGLC2    | P0DOY2     | 1.25E-03 | 5.21E-03 |
| -0.51 | Alpha-2-HS-glycoprotein                      | AHSG     | P02765     | 2.08E-03 | 7.57E-03 |
| -0.52 | Ig gamma-4 chain C region                    | IGHG4    | P01861     | 1.82E-03 | 6.92E-03 |
| -0.52 | Immunoglobulin lambda variable 1-47          | IGLV1-47 | P01700     | 5.91E-03 | 1.83E-02 |
| -0.53 | Cathelicidin antimicrobial peptide           | CAMP     | P49913     | 9.31E-04 | 4.17E-03 |
| -0.54 | Properdin                                    | CFP      | P27918     | 5.57E-05 | 4.86E-04 |
| -0.54 | Ig gamma-2 chain C region                    | IGHG2    | P01859     | 3.31E-03 | 1.15E-02 |
| -0.55 | Afamin                                       | AFM      | P43652     | 5.34E-03 | 1.71E-02 |
| -0.56 | Immunoglobulin heavy variable 3-15           | IGHV3-15 | A0A0B4J1V0 | 2.08E-03 | 7.57E-03 |

|       |                                               |           |            |          |          |
|-------|-----------------------------------------------|-----------|------------|----------|----------|
| -0.57 | Immunoglobulin heavy variable 1-18            | IGHV1-18  | AOA0C4DH31 | 8.79E-05 | 6.99E-04 |
| -0.57 | Immunoglobulin lambda-like polypeptide 5      | IGLL5     | B9A064     | 6.04E-03 | 1.83E-02 |
| -0.60 | Ig heavy chain V-I region HG3                 | IGHV1-3   | PODP01     | 8.19E-04 | 4.10E-03 |
| -0.60 | Immunoglobulin kappa variable 3D-20           | IGKV3D-20 | AOA0C4DH25 | 7.87E-03 | 2.33E-02 |
| -0.62 | Dynein heavy chain 3, axonemal                | DNAH3     | Q8TD57     | 2.03E-02 | 4.85E-02 |
| -0.62 | Ig gamma-3 chain C region                     | IGHG3     | P01860     | 4.78E-05 | 4.44E-04 |
| -0.63 | ATPase family AAA domain-containing protein 2 | ATAD2     | Q6PL18     | 1.21E-03 | 5.19E-03 |
| -0.68 | Angiotensinogen                               | AGT       | P01019     | 9.79E-06 | 1.49E-04 |
| -0.90 | Ficolin-3                                     | FCN3      | O75636     | 1.09E-02 | 2.94E-02 |
| -1.31 | Neutrophil defensin 3                         | DEFA3     | P59666     | 1.15E-02 | 3.01E-02 |
| -1.31 | Immunoglobulin lambda variable 3-10           | IGLV3-10  | AOA075B6K4 | 9.48E-04 | 4.17E-03 |
| -1.36 | Alpha-fetoprotein                             | AFP       | P02771     | 2.44E-04 | 1.51E-03 |

**Supplementary Table 3.** Significantly differentiated proteins in the main cohort DOL7 vs DOL0 (q-value < 0.05).

| FC<br>log2 | Protein.names                   | Gene     | UPID   | p-value  | q-value  |
|------------|---------------------------------|----------|--------|----------|----------|
| 3.17       | Haptoglobin                     | HP       | P00738 | 6.11E-04 | 1.25E-02 |
| 1.39       | Complement component C9         | C9       | P02748 | 1.93E-03 | 2.69E-02 |
| 0.64       | Vitamin K-dependent protein S   | PROS1    | P07225 | 2.19E-03 | 2.69E-02 |
| 0.61       | Alpha-1-acid glycoprotein 1     | ORM1     | P02763 | 5.74E-04 | 1.25E-02 |
| 0.40       | Complement C1s subcomponent     | C1S      | P09871 | 2.67E-05 | 1.64E-03 |
| 0.37       | Complement factor B             | CFB      | P00751 | 1.30E-04 | 5.32E-03 |
| 0.37       | Alpha-1-antichymotrypsin        | SERPINA3 | P01011 | 3.22E-04 | 9.89E-03 |
| 0.28       | Ceruloplasmin                   | CP       | P00450 | 2.00E-03 | 2.69E-02 |
| -0.33      | Ig kappa chain V-I region HK102 | IGKV1-5  | P01602 | 1.57E-03 | 2.69E-02 |

**Supplementary Table 4.** Significantly differentiated proteins in the validation cohort DOL1 vs DOL0 (q-value < 0.05).



| <b>FC<br/>log2</b> | <b>Protein name</b>                          | <b>Gene</b> | <b>UPID</b> | <b>p-value</b> | <b>q-value</b> |
|--------------------|----------------------------------------------|-------------|-------------|----------------|----------------|
| 2.64               | Histidine-rich glycoprotein                  | HRG         | P04196      | 1.12E-04       | 5.19E-03       |
| 1.40               | Apolipoprotein C-III                         | APOC3       | P02656      | 7.19E-04       | 9.08E-03       |
| 1.38               | Complement component C8 alpha chain          | C8A         | P07357      | 7.72E-03       | 3.72E-02       |
| 1.11               | Apolipoprotein B-100                         | APOB        | P04114      | 9.82E-04       | 1.06E-02       |
| 0.84               | Inter-alpha-trypsin inhibitor heavy chain H3 | ITIH3       | Q06033      | 1.18E-03       | 1.13E-02       |
| 0.60               | Apolipoprotein E                             | APOE        | P02649      | 2.75E-03       | 2.04E-02       |
| 0.59               | Complement C1q subcomponent subunit C        | C1QC        | P02747      | 2.82E-03       | 2.04E-02       |
| 0.58               | Complement factor B                          | CFB         | P00751      | 3.41E-03       | 2.22E-02       |
| 0.55               | Plasma protease C1 inhibitor                 | SERPING1    | P05155      | 1.81E-03       | 1.47E-02       |
| 0.49               | Apolipoprotein M                             | APOM        | O95445      | 1.22E-03       | 1.13E-02       |
| 0.46               | Apolipoprotein D                             | APOD        | P05090      | 5.77E-04       | 8.34E-03       |
| 0.43               | Plasma kallikrein                            | KLKB1       | P03952      | 5.21E-03       | 2.94E-02       |
| 0.40               | Complement C1s subcomponent                  | C1S         | P09871      | 7.62E-03       | 3.72E-02       |
| 0.38               | Ceruloplasmin                                | CP          | P00450      | 4.09E-03       | 2.53E-02       |
| 0.28               | Alpha-2-antiplasmin                          | SERPINF2    | P08697      | 4.74E-04       | 8.34E-03       |
| -0.32              | Ig gamma-2 chain C region                    | IGHG2       | P01859      | 4.63E-03       | 2.73E-02       |
| -0.32              | Extracellular matrix protein 1               | ECM1        | Q16610      | 9.09E-03       | 4.07E-02       |
| -0.33              | Angiotensinogen                              | AGT         | P01019      | 1.20E-04       | 5.19E-03       |
| -0.35              | Complement component C7                      | C7          | P10643      | 5.75E-03       | 3.11E-02       |
| -0.37              | Ig heavy chain V-I region HG3                | IGHV1-3     | PODP01      | 7.68E-04       | 9.08E-03       |
| -0.37              | Ig gamma-4 chain C region                    | IGHG4       | P01861      | 5.34E-04       | 8.34E-03       |
| -0.39              | Immunoglobulin kappa variable 3-11           | IGKV3-11    | P04433      | 4.21E-04       | 8.34E-03       |
| -0.47              | Immunoglobulin kappa variable 3D-20          | IGKV3D-20   | AOA0C4DH25  | 1.17E-02       | 4.90E-02       |
| -0.52              | Fibulin-1                                    | FBLN1       | P23142      | 3.16E-03       | 2.17E-02       |
| -0.54              | Immunoglobulin lambda constant 2             | IGLC2       | PODOY2      | 8.60E-03       | 3.99E-02       |
| -0.55              | Immunoglobulin kappa variable 1-33           | IGKV1-33    | P01594      | 8.76E-05       | 5.19E-03       |

|       |                           |      |        |          |          |
|-------|---------------------------|------|--------|----------|----------|
| -0.84 | Peptidase inhibitor 16    | PI16 | Q6UXB8 | 4.32E-04 | 8.34E-03 |
| -0.88 | von Willebrand factor     | VWF  | P04275 | 5.46E-04 | 8.34E-03 |
| -4.81 | Serum amyloid A-1 protein | SAA1 | PODJI8 | 1.14E-02 | 4.90E-02 |

**Supplementary Table 5.** Significant proteins in the validation cohort DOL3 vs DOL0 (q-value < 0.05).

| <b>FC log2</b> | <b>Protein name</b>                   | <b>Gene</b> | <b>UPID</b> | <b>p-value</b> | <b>q-value</b> |
|----------------|---------------------------------------|-------------|-------------|----------------|----------------|
| 2.23           | Haptoglobin                           | HP          | P00738      | 2.39E-03       | 7.96E-03       |
| 1.50           | Apolipoprotein B-100                  | APOB        | P04114      | 9.58E-07       | 3.86E-05       |
| 1.49           | Histidine-rich glycoprotein           | HRG         | P04196      | 1.93E-02       | 3.71E-02       |
| 1.40           | C4b-binding protein alpha chain       | C4BPA       | P04003      | 1.15E-04       | 1.04E-03       |
| 1.11           | Apolipoprotein C-III                  | APOC3       | P02656      | 3.23E-04       | 1.87E-03       |
| 1.07           | Alpha-1-acid glycoprotein 2           | ORM2        | P19652      | 3.55E-04       | 1.93E-03       |
| 1.05           | Ig mu chain C region                  | IGHM        | P01871      | 2.14E-05       | 3.70E-04       |
| 1.05           | Complement component C8 beta chain    | C8B         | P07358      | 4.31E-08       | 5.22E-06       |
| 1.02           | Complement component C8 alpha chain   | C8A         | P07357      | 1.26E-04       | 1.04E-03       |
| 0.98           | CD5 antigen-like                      | CD5L        | O43866      | 1.16E-05       | 2.81E-04       |
| 0.97           | Hyaluronan-binding protein 2          | HABP2       | Q14520      | 6.14E-05       | 7.44E-04       |
| 0.87           | Immunoglobulin J chain                | IGJ         | P01591      | 1.67E-04       | 1.12E-03       |
| 0.83           | Vitamin K-dependent protein S         | PROS1       | P07225      | 1.86E-03       | 6.42E-03       |
| 0.83           | Apolipoprotein A-I                    | APOA1       | P02647      | 2.71E-04       | 1.73E-03       |
| 0.76           | Complement factor B                   | CFB         | P00751      | 9.15E-07       | 3.86E-05       |
| 0.76           | Hemopexin                             | HPX         | P02790      | 2.66E-02       | 4.87E-02       |
| 0.64           | Apolipoprotein M                      | APOM        | O95445      | 5.78E-05       | 7.44E-04       |
| 0.60           | Complement C1q subcomponent subunit C | C1QC        | P02747      | 1.36E-03       | 5.02E-03       |
| 0.59           | Complement C4-B                       | C4B         | P0C0L5      | 1.55E-04       | 1.10E-03       |
| 0.56           | Collagen alpha-1(I) chain             | COL1A1      | P02452      | 8.72E-03       | 2.11E-02       |
| 0.55           | Plasma protease C1 inhibitor          | SERPING1    | P05155      | 6.72E-03       | 1.77E-02       |
| 0.53           | Ceruloplasmin                         | CP          | P00450      | 5.91E-03       | 1.59E-02       |
| 0.47           | Complement C5                         | C5          | P01031      | 9.24E-03       | 2.19E-02       |
| 0.46           | Fibrinogen alpha chain                | FGA         | P02671      | 1.65E-02       | 3.38E-02       |
| 0.45           | Complement C1r subcomponent           | C1R         | P00736      | 8.09E-03       | 2.00E-02       |
| 0.41           | Fibronectin                           | FN1         | P02751      | 3.67E-04       | 1.93E-03       |
| 0.39           | Vitronectin                           | VTN         | P04004      | 1.72E-02       | 3.47E-02       |
| 0.36           | Complement C1s subcomponent           | C1S         | P09871      | 3.04E-03       | 9.30E-03       |

|       |                                          |           |            |          |          |
|-------|------------------------------------------|-----------|------------|----------|----------|
| 0.29  | Apolipoprotein D                         | APOD      | P05090     | 1.03E-02 | 2.35E-02 |
| 0.27  | Complement factor H                      | CFH       | P08603     | 1.28E-04 | 1.04E-03 |
| 0.23  | Prothrombin                              | F2        | P00734     | 3.07E-03 | 9.30E-03 |
| -0.26 | Gelsolin                                 | GSN       | P06396     | 4.94E-03 | 1.40E-02 |
| -0.29 | Ig gamma-4 chain C region                | IGHG4     | P01861     | 1.37E-03 | 5.02E-03 |
| -0.31 | Serotransferrin                          | TF        | P02787     | 2.94E-03 | 9.30E-03 |
| -0.31 | Immunoglobulin kappa variable 3D-20      | IGKV3D-20 | A0A0C4DH25 | 1.65E-02 | 3.38E-02 |
| -0.32 | Serum albumin                            | ALB       | P02768     | 3.14E-05 | 4.75E-04 |
| -0.32 | Immunoglobulin lambda constant 2         | IGLC2     | P0DOY2     | 1.83E-03 | 6.42E-03 |
| -0.33 | Immunoglobulin kappa variable 3-11       | IGKV3D-11 | P04433     | 1.08E-03 | 4.36E-03 |
| -0.36 | Immunoglobulin heavy variable 3-21       | IGHV3-21  | A0A0B4J1V1 | 2.39E-02 | 4.52E-02 |
| -0.37 | Immunoglobulin heavy variable 3-15       | IGHV3-15  | A0A0B4J1V0 | 2.43E-03 | 7.96E-03 |
| -0.39 | Immunoglobulin kappa variable 3-15       | IGKV3-15  | P01624     | 1.41E-05 | 2.85E-04 |
| -0.40 | Immunoglobulin kappa variable 2-30       | IGKV2-30  | P06310     | 3.25E-04 | 1.87E-03 |
| -0.40 | Immunoglobulin kappa variable 3-20       | IGKV3-20  | P01619     | 1.20E-02 | 2.69E-02 |
| -0.43 | Ig gamma-3 chain C region                | IGHG3     | P01860     | 4.01E-03 | 1.18E-02 |
| -0.46 | Immunoglobulin lambda variable 3-21      | IGLV3-21  | P80748     | 1.31E-04 | 1.04E-03 |
| -0.47 | Complement component C7                  | C7        | P10643     | 7.90E-03 | 1.99E-02 |
| -0.47 | Angiotensinogen                          | AGT       | P01019     | 5.64E-04 | 2.63E-03 |
| -0.48 | Afamin                                   | AFM       | P43652     | 2.58E-02 | 4.80E-02 |
| -0.49 | Immunoglobulin kappa variable 2-28       | IGKV2-28  | A0A075B6P5 | 5.25E-04 | 2.54E-03 |
| -0.50 | Ig kappa chain C region                  | IGKC      | P01834     | 1.92E-06 | 5.80E-05 |
| -0.52 | Immunoglobulin lambda-like polypeptide 5 | IGLL5     | B9A064     | 8.43E-04 | 3.52E-03 |
| -0.55 | Immunoglobulin heavy variable 1-8        | IGHV1-8   | P0DP01     | 1.92E-02 | 3.71E-02 |
| -0.56 | Immunoglobulin kappa variable 1-5        | IGKV1-5   | P01602     | 7.42E-05 | 8.16E-04 |
| -0.59 | Platelet basic protein                   | PPBP      | P02775     | 1.56E-02 | 3.36E-02 |
| -0.69 | Ig gamma-1 chain C region                | IGHG1     | P01857     | 3.89E-04 | 1.96E-03 |
| -0.74 | Immunoglobulin heavy variable 1-18       | IGHV1-18  | A0A0C4DH31 | 9.68E-03 | 2.25E-02 |
| -0.96 | Transthyretin                            | TTR       | P02766     | 1.80E-02 | 3.57E-02 |
| -1.20 | Actin, cytoplasmic 1                     | ACTB      | P60709     | 4.99E-03 | 1.40E-02 |

|       |                                     |          |            |          |          |
|-------|-------------------------------------|----------|------------|----------|----------|
| -1.25 | Immunoglobulin lambda variable 3-16 | IGLV3-16 | A0A075B6K0 | 7.36E-03 | 1.89E-02 |
| -1.30 | Alpha-fetoprotein                   | AFP      | P02771     | 1.38E-04 | 1.04E-03 |
| -2.92 | Neutrophil defensin 3               | DEFA3    | P59666     | 6.71E-04 | 2.90E-03 |

**Supplementary Table 6.** Significant proteins in the validation cohort DOL7 vs DOL0 (q-value < 0.05).

| UPID        | Protein names                         | GN        | missing values |      |      |      | DOL1 vs DOL0 |      |          | DOL3 vs DOL0 |       |          | DOL7 vs DOL0 |       |          |
|-------------|---------------------------------------|-----------|----------------|------|------|------|--------------|------|----------|--------------|-------|----------|--------------|-------|----------|
|             |                                       |           | DOL0           | DOL1 | DOL3 | DOL7 | p-value      | FC   | q-value  | p-value      | FC    | q-value  | p-value      | FC    | q-value  |
| P0DJ18      | Serum amyloid A-1 protein             | SAA1      | 3              | 1    | 0    | 0    | 1.68E-07     | 2.85 | 3.00E-05 | 8.57E-01     | 0.19  | 9.22E-01 | 8.30E-01     | -0.16 | 8.96E-01 |
| P00738      | Haptoglobin                           | HP        | 0              | 0    | 0    | 0    | 1.48E-04     | 2.16 | 3.30E-03 | 1.52E-03     | 2.22  | 7.59E-03 | 8.35E-04     | 2.81  | 4.10E-03 |
| P0CF74      | Ig lambda-6 chain C region            | IGLC6     | 10             | 4    | 3    | 4    | 7.45E-01     | 1.51 | 8.45E-01 | NA           | NA    | NA       | 3.05E-01     | 0.76  | 4.07E-01 |
| P0DJ19      | Serum amyloid A-2 protein             | SAA2      | 9              | 0    | 3    | 5    | 2.73E-02     | 1.34 | 1.10E-01 | 8.48E-01     | -0.21 | 9.18E-01 | NA           | NA    | NA       |
| P02763      | Alpha-1-acid glycoprotein 1           | ORM1      | 0              | 0    | 0    | 0    | 1.21E-04     | 1.01 | 3.07E-03 | 6.02E-04     | 0.82  | 5.11E-03 | 8.71E-06     | 1.17  | 1.46E-04 |
| P04196      | Histidine-rich glycoprotein           | HRG       | 0              | 0    | 0    | 0    | 1.94E-02     | 0.85 | 8.85E-02 | 3.77E-03     | 0.95  | 1.73E-02 | 5.82E-05     | 1.38  | 4.86E-04 |
| P02748      | Complement component C9               | C9        | 1              | 0    | 0    | 0    | 1.18E-04     | 0.81 | 3.07E-03 | 2.13E-04     | 1.11  | 2.42E-03 | 1.30E-05     | 1.82  | 1.67E-04 |
| P13671      | Complement component C6               | C6        | 0              | 0    | 0    | 0    | 1.48E-03     | 0.76 | 1.54E-02 | 1.15E-02     | 0.37  | 4.09E-02 | 4.30E-02     | 0.30  | 9.26E-02 |
| P02743      | Serum amyloid P-component             | APCS      | 0              | 0    | 0    | 0    | 1.94E-05     | 0.74 | 1.73E-03 | 1.13E-02     | 0.40  | 4.08E-02 | 5.87E-03     | 0.43  | 1.83E-02 |
| P02750      | Leucine-rich alpha-2-glycoprotein     | LRG1      | 9              | 1    | 0    | 0    | 8.38E-05     | 0.73 | 2.99E-03 | 3.96E-02     | 0.67  | 9.47E-02 | NA           | NA    | NA       |
| P02671      | Fibrinogen alpha chain                | FGA       | 0              | 0    | 0    | 0    | 9.88E-04     | 0.64 | 1.35E-02 | 7.06E-04     | 0.41  | 5.47E-03 | 9.49E-05     | 0.53  | 7.21E-04 |
| P02656      | Apolipoprotein C-III                  | APOC3     | 0              | 0    | 0    | 0    | 1.65E-03     | 0.59 | 1.54E-02 | 8.09E-02     | 0.34  | 1.53E-01 | 9.47E-02     | 0.45  | 1.61E-01 |
| P07360      | Complement component C8 gamma chain   | C8G       | 0              | 0    | 0    | 0    | 6.22E-03     | 0.58 | 3.95E-02 | 4.21E-05     | 1.09  | 9.77E-04 | 2.00E-04     | 1.39  | 1.39E-03 |
| P01011      | Alpha-1-antichymotrypsin              | SERPIN A3 | 0              | 0    | 0    | 0    | 3.30E-04     | 0.58 | 6.33E-03 | 1.44E-03     | 0.65  | 7.42E-03 | 7.03E-06     | 0.89  | 1.45E-04 |
| P02679      | Fibrinogen gamma chain                | FGG       | 0              | 0    | 0    | 0    | 3.73E-03     | 0.52 | 2.89E-02 | 1.80E-04     | 0.38  | 2.18E-03 | 1.96E-05     | 0.56  | 2.29E-04 |
| P0DP04      |                                       |           | 9              | 2    | 4    | 3    | 3.31E-01     | 0.51 | 5.12E-01 | 4.55E-04     | -0.49 | 4.55E-03 | 5.47E-02     | -0.17 | 1.07E-01 |
| A0A075B6 I0 |                                       | IGLV8-61  | 4              | 1    | 1    | 1    | 2.71E-01     | 0.48 | 4.64E-01 | 3.01E-02     | -0.33 | 7.76E-02 | 1.07E-01     | -0.46 | 1.76E-01 |
| P01591      | Immunoglobulin J chain                | IGJ       | 4              | 1    | 1    | 0    | 2.39E-01     | 0.42 | 4.29E-01 | 2.56E-01     | 0.30  | 3.67E-01 | 2.06E-05     | 2.63  | 2.29E-04 |
| P01782      | Ig heavy chain V-III region DOB       | IGHV3-20  | 3              | 5    | 3    | 0    | 5.29E-01     | 0.42 | 6.89E-01 | 7.21E-01     | -0.28 | 8.17E-01 | 8.44E-02     | -0.34 | 1.48E-01 |
| Q6UXB8      | Peptidase inhibitor 16                | PI16      | 0              | 0    | 0    | 0    | 6.25E-02     | 0.42 | 1.80E-01 | 5.52E-04     | -0.62 | 4.94E-03 | 4.07E-01     | -0.35 | 5.18E-01 |
| P36980      | Complement factor H-related protein 2 | CFHR2     | 0              | 0    | 0    | 0    | 4.58E-02     | 0.41 | 1.48E-01 | 1.54E-02     | 0.41  | 4.95E-02 | 5.37E-01     | -0.08 | 6.48E-01 |
| P19652      | Alpha-1-acid glycoprotein 2           | ORM2      | 1              | 0    | 0    | 0    | 1.06E-01     | 0.40 | 2.55E-01 | 2.65E-02     | 0.47  | 6.94E-02 | 3.01E-05     | 1.02  | 3.04E-04 |
| A0A075B6 K4 |                                       | IGLV3-10  | 0              | 0    | 0    | 0    | 5.16E-01     | 0.38 | 6.86E-01 | 4.54E-01     | -0.21 | 5.80E-01 | 9.48E-04     | -1.31 | 4.17E-03 |
| P02675      | Fibrinogen beta chain                 | FGB       | 0              | 0    | 0    | 0    | 1.91E-02     | 0.37 | 8.85E-02 | 9.56E-04     | 0.32  | 6.25E-03 | 1.07E-05     | 0.55  | 1.49E-04 |
| Q03591      | Complement factor H-related protein 1 | CFHR1     | 5              | 1    | 1    | 0    | 8.99E-03     | 0.37 | 5.16E-02 | 8.73E-01     | 0.08  | 9.27E-01 | 5.26E-01     | 0.04  | 6.41E-01 |

|        |                                                            |           |    |   |   |   |          |      |          |          |       |          |          |       |          |
|--------|------------------------------------------------------------|-----------|----|---|---|---|----------|------|----------|----------|-------|----------|----------|-------|----------|
| P00751 | Complement factor B                                        | CFB       | 0  | 0 | 0 | 0 | 4.16E-05 | 0.35 | 2.47E-03 | 4.08E-09 | 0.59  | 6.94E-07 | 1.32E-07 | 0.71  | 1.11E-05 |
| P04114 | Apolipoprotein B-100                                       | APOB      | 0  | 0 | 0 | 0 | 7.25E-02 | 0.35 | 1.93E-01 | 1.62E-04 | 0.85  | 2.11E-03 | 1.61E-03 | 0.62  | 6.28E-03 |
| P00450 | Ceruloplasmin                                              | CP        | 0  | 0 | 0 | 0 | 9.27E-04 | 0.33 | 1.35E-02 | 2.25E-05 | 0.45  | 9.57E-04 | 7.96E-03 | 0.45  | 2.33E-02 |
| P49755 | Transmembrane emp24 domain-containing protein 10           | TMED10    | 13 | 5 | 6 | 8 | 7.84E-01 | 0.31 | 8.62E-01 | NA       | NA    | NA       | NA       | NA    | NA       |
| P15169 | Carboxypeptidase N catalytic chain                         | CPN1      | 0  | 0 | 0 | 0 | 1.20E-01 | 0.30 | 2.71E-01 | 5.38E-01 | 0.01  | 6.72E-01 | 6.61E-01 | -0.02 | 7.51E-01 |
| P07358 | Complement component C8 beta chain                         | C8B       | 0  | 0 | 0 | 0 | 1.09E-01 | 0.29 | 2.58E-01 | 5.44E-04 | 0.46  | 4.94E-03 | 7.09E-07 | 0.62  | 3.94E-05 |
| Q16610 | Extracellular matrix protein 1                             | ECM1      | 0  | 0 | 0 | 0 | 2.70E-02 | 0.28 | 1.10E-01 | 3.75E-01 | -0.15 | 5.06E-01 | 6.79E-01 | -0.10 | 7.66E-01 |
| P18065 | Insulin-like growth factor-binding protein 2               | IGFBP2    | 7  | 4 | 4 | 5 | 5.43E-01 | 0.27 | 6.90E-01 | 5.13E-03 | -0.86 | 2.23E-02 | NA       | NA    | NA       |
| P21453 | Sphingosine 1-phosphate receptor 1                         | S1PR1     | 13 | 3 | 5 | 2 | 1.97E-03 | 0.26 | 1.75E-02 | NA       | NA    | NA       | 8.67E-01 | 0.01  | 9.19E-01 |
| Q06033 | Inter-alpha-trypsin inhibitor heavy chain H3               | ITIH3     | 0  | 0 | 0 | 0 | 2.30E-01 | 0.24 | 4.18E-01 | 6.81E-07 | 0.80  | 5.79E-05 | 9.35E-02 | 0.43  | 1.61E-01 |
| P05160 | Coagulation factor XIII B chain                            | F13B      | 0  | 0 | 0 | 0 | 2.08E-01 | 0.23 | 3.86E-01 | 1.40E-02 | 0.28  | 4.66E-02 | 2.88E-06 | 0.67  | 8.01E-05 |
| P01344 | Insulin-like growth factor II                              | IGF2      | 7  | 1 | 0 | 1 | 1.42E-01 | 0.22 | 2.97E-01 | 6.56E-02 | -0.60 | 1.30E-01 | 7.75E-01 | 0.09  | 8.46E-01 |
| P35542 | Serum amyloid A-4 protein                                  | SAA4      | 0  | 0 | 0 | 0 | 2.14E-01 | 0.20 | 3.93E-01 | 6.44E-01 | 0.09  | 7.65E-01 | 8.66E-03 | 0.53  | 2.49E-02 |
| Q12805 | EGF-containing fibulin-like extracellular matrix protein 1 | EFEMP1    | 10 | 3 | 3 | 0 | 6.77E-02 | 0.20 | 1.88E-01 | 2.84E-01 | -0.15 | 3.99E-01 | 1.16E-01 | -0.36 | 1.84E-01 |
| P25311 | Zinc-alpha-2-glycoprotein                                  | AZGP1     | 0  | 0 | 0 | 0 | 1.88E-01 | 0.20 | 3.60E-01 | 1.37E-01 | 0.18  | 2.21E-01 | 8.69E-01 | -0.02 | 9.19E-01 |
| P06681 | Complement C2                                              | C2        | 0  | 0 | 0 | 0 | 2.93E-01 | 0.17 | 4.78E-01 | 2.01E-02 | 0.24  | 5.78E-02 | 1.93E-01 | 0.24  | 2.75E-01 |
| P00736 | Complement C1r subcomponent                                | C1R       | 0  | 0 | 0 | 0 | 1.29E-01 | 0.17 | 2.83E-01 | 8.93E-05 | 0.46  | 1.38E-03 | 3.06E-04 | 0.38  | 1.81E-03 |
| P02647 | Apolipoprotein A-I                                         | APOA1     | 0  | 0 | 0 | 0 | 2.91E-01 | 0.17 | 4.78E-01 | 1.39E-01 | -0.32 | 2.24E-01 | 2.24E-01 | 0.35  | 3.12E-01 |
| P06310 | Ig kappa chain V-II region RPMI 6410                       | IGKV2D-30 | 0  | 1 | 0 | 0 | 6.94E-01 | 0.15 | 8.08E-01 | 6.09E-02 | -0.16 | 1.28E-01 | 2.88E-01 | -0.17 | 3.92E-01 |
| P07357 | Complement component C8 alpha chain                        | C8A       | 0  | 0 | 0 | 0 | 1.23E-01 | 0.15 | 2.73E-01 | 9.43E-06 | 0.55  | 5.34E-04 | 8.85E-04 | 0.79  | 4.15E-03 |
| P36955 | Pigment epithelium-derived factor                          | SERPINF1  | 0  | 0 | 0 | 0 | 1.85E-01 | 0.15 | 3.60E-01 | 3.41E-03 | -0.44 | 1.61E-02 | 4.41E-03 | -0.42 | 1.44E-02 |
| P33151 | Cadherin-5                                                 | CDH5      | 2  | 1 | 0 | 0 | 3.17E-01 | 0.15 | 4.99E-01 | 1.10E-02 | -0.53 | 4.08E-02 | 5.85E-02 | -0.58 | 1.14E-01 |
| P61769 | Beta-2-microglobulin                                       | B2M       | 0  | 0 | 0 | 0 | 5.57E-01 | 0.14 | 7.00E-01 | 9.27E-01 | 0.06  | 9.61E-01 | 5.49E-01 | 0.23  | 6.50E-01 |

## Supplementary Material

|        |                                          |           |    |   |   |   |          |       |          |          |       |          |          |       |          |
|--------|------------------------------------------|-----------|----|---|---|---|----------|-------|----------|----------|-------|----------|----------|-------|----------|
| P0DOY3 |                                          |           | 0  | 0 | 0 | 0 | 2.59E-01 | 0.13  | 4.61E-01 | 9.24E-01 | 0.11  | 9.61E-01 | 4.11E-02 | -0.62 | 9.16E-02 |
| P27918 | Properdin                                | CFP       | 0  | 0 | 0 | 0 | 5.11E-01 | 0.13  | 6.83E-01 | 8.72E-02 | -0.25 | 1.53E-01 | 5.57E-05 | -0.54 | 4.86E-04 |
| Q9NZP8 | Complement C1r subcomponent-like protein | C1RL      | 3  | 1 | 0 | 1 | 6.32E-01 | 0.10  | 7.76E-01 | 4.11E-02 | 0.29  | 9.71E-02 | 4.79E-01 | 0.17  | 5.88E-01 |
| P0COL5 | Complement C4-B                          | C4B       | 0  | 0 | 0 | 0 | 9.47E-02 | 0.09  | 2.34E-01 | 7.97E-05 | 0.40  | 1.36E-03 | 2.68E-02 | 0.30  | 6.14E-02 |
| P02652 | Apolipoprotein A-II                      | APOA2     | 0  | 0 | 0 | 0 | 5.77E-01 | 0.09  | 7.18E-01 | 1.44E-02 | -0.87 | 4.72E-02 | 6.00E-02 | 0.83  | 1.15E-01 |
| P01031 | Complement C5                            | C5        | 0  | 0 | 0 | 0 | 3.62E-01 | 0.09  | 5.46E-01 | 1.32E-03 | 0.34  | 7.23E-03 | 7.11E-02 | 0.25  | 1.31E-01 |
| O14791 | Apolipoprotein L1                        | APOL1     | 0  | 0 | 0 | 0 | 8.60E-01 | 0.09  | 8.88E-01 | 3.39E-02 | 0.59  | 8.36E-02 | 3.61E-01 | 0.26  | 4.70E-01 |
| P02747 | Complement C1q subcomponent subunit C    | C1QC      | 0  | 0 | 0 | 0 | 2.64E-01 | 0.09  | 4.64E-01 | 1.64E-02 | 0.25  | 5.16E-02 | 2.57E-02 | 0.33  | 5.96E-02 |
| P01718 | Ig lambda chain V-IV region Kern         |           | 10 | 0 | 1 | 2 | 8.64E-01 | 0.08  | 8.88E-01 | NA       | NA    | NA       | 1.00E+00 | 0.79  | 1.00E+00 |
| P80748 | Ig lambda chain V-III region LOI         | IGLV3-9   | 0  | 1 | 0 | 0 | 8.78E-01 | 0.07  | 8.93E-01 | 3.28E-02 | -0.64 | 8.21E-02 | 9.51E-01 | -0.02 | 9.69E-01 |
| P48357 | Leptin receptor                          | LEPR      | 0  | 0 | 0 | 0 | 2.86E-01 | 0.07  | 4.76E-01 | 3.57E-01 | -0.03 | 4.85E-01 | 1.74E-02 | -0.19 | 4.33E-02 |
| P0DOY2 |                                          |           | 0  | 0 | 0 | 0 | 7.26E-01 | 0.07  | 8.37E-01 | 1.30E-01 | -0.17 | 2.14E-01 | 1.25E-03 | -0.49 | 5.21E-03 |
| P01024 | Complement C3                            | C3        | 0  | 0 | 0 | 0 | 8.79E-02 | 0.06  | 2.27E-01 | 2.37E-01 | 0.03  | 3.48E-01 | 2.96E-01 | 0.10  | 3.99E-01 |
| P09871 | Complement C1s subcomponent              | C1S       | 0  | 0 | 0 | 0 | 4.85E-01 | 0.06  | 6.69E-01 | 4.60E-05 | 0.29  | 9.77E-04 | 2.23E-04 | 0.31  | 1.43E-03 |
| P10643 | Complement component C7                  | C7        | 0  | 0 | 0 | 0 | 4.99E-01 | 0.05  | 6.77E-01 | 4.61E-03 | -0.19 | 2.06E-02 | 1.03E-06 | -0.48 | 4.11E-05 |
| P01706 | Ig lambda chain V-II region BOH          |           | 3  | 3 | 0 | 0 | 4.12E-01 | 0.04  | 6.01E-01 | 4.33E-01 | -0.19 | 5.57E-01 | 6.44E-01 | -0.08 | 7.42E-01 |
| P01766 | Ig heavy chain V-III region BRO          |           | 15 | 3 | 5 | 5 | 8.53E-01 | 0.04  | 8.88E-01 | NA       | NA    | NA       | NA       | NA    | NA       |
| P01859 | Ig gamma-2 chain C region                | IGHG2     | 0  | 0 | 0 | 0 | 9.24E-01 | 0.04  | 9.35E-01 | 4.80E-01 | -0.08 | 6.08E-01 | 3.31E-03 | -0.54 | 1.15E-02 |
| P05156 | Complement factor I                      | CFI       | 0  | 0 | 0 | 0 | 8.11E-01 | 0.04  | 8.74E-01 | 9.80E-01 | -0.06 | 9.92E-01 | 1.56E-01 | 0.19  | 2.41E-01 |
| P00739 | Haptoglobin-related protein              | HPR       | 5  | 2 | 0 | 1 | 9.44E-01 | 0.03  | 9.49E-01 | 1.54E-01 | 0.36  | 2.44E-01 | 4.30E-03 | 1.02  | 1.44E-02 |
| P26927 | Hepatocyte growth factor-like protein    | MST1      | 0  | 0 | 0 | 0 | 8.70E-01 | 0.03  | 8.90E-01 | 3.23E-01 | 0.07  | 4.46E-01 | 2.49E-01 | -0.13 | 3.41E-01 |
| P04003 | C4b-binding protein alpha chain          | C4BPA     | 0  | 0 | 0 | 0 | 8.60E-01 | 0.03  | 8.88E-01 | 8.19E-02 | 0.23  | 1.53E-01 | 1.83E-02 | 0.53  | 4.44E-02 |
| P02766 | Transthyretin                            | TTR       | 0  | 0 | 0 | 0 | 5.37E-01 | 0.02  | 6.89E-01 | 1.79E-02 | -0.24 | 5.43E-02 | 3.16E-01 | -0.12 | 4.19E-01 |
| P02768 | Serum albumin                            | ALB       | 0  | 0 | 0 | 0 | 3.75E-01 | 0.02  | 5.61E-01 | 3.22E-03 | -0.21 | 1.57E-02 | 1.78E-02 | -0.27 | 4.38E-02 |
| P01042 | Kininogen-1                              | KNG1      | 0  | 0 | 0 | 0 | 7.35E-01 | 0.02  | 8.39E-01 | 9.25E-02 | 0.12  | 1.57E-01 | 8.94E-04 | 0.28  | 4.15E-03 |
| P01009 | Alpha-1-antitrypsin                      | SERPIN A1 | 0  | 0 | 0 | 0 | 5.38E-01 | 0.01  | 6.89E-01 | 7.52E-01 | -0.01 | 8.47E-01 | 1.56E-03 | -0.43 | 6.28E-03 |
| P61626 | Lysozyme C                               | LYZ       | 0  | 0 | 2 | 3 | 9.53E-01 | 0.00  | 9.53E-01 | 1.31E-02 | -0.49 | 4.53E-02 | 4.06E-01 | -0.20 | 5.18E-01 |
| P06396 | Gelsolin                                 | GSN       | 0  | 0 | 0 | 0 | 7.29E-01 | -0.01 | 8.37E-01 | 4.23E-01 | -0.05 | 5.49E-01 | 1.62E-03 | -0.34 | 6.28E-03 |
| P04217 | Alpha-1B-glycoprotein                    | A1BG      | 0  | 0 | 0 | 0 | 5.38E-01 | -0.01 | 6.89E-01 | 4.15E-01 | -0.06 | 5.47E-01 | 9.22E-02 | 0.13  | 1.60E-01 |
| P00734 | Prothrombin                              | F2        | 0  | 0 | 0 | 0 | 8.07E-01 | -0.01 | 8.74E-01 | 2.15E-01 | 0.11  | 3.23E-01 | 6.06E-01 | 0.04  | 7.08E-01 |
| P01008 | Antithrombin-III                         | SERPIN C1 | 0  | 0 | 0 | 0 | 6.87E-01 | -0.02 | 8.07E-01 | 6.91E-01 | 0.01  | 7.94E-01 | 1.14E-01 | 0.10  | 1.83E-01 |



|            |                                              |          |   |   |   |   |          |       |          |          |       |          |          |       |          |
|------------|----------------------------------------------|----------|---|---|---|---|----------|-------|----------|----------|-------|----------|----------|-------|----------|
| Q14624     | Inter-alpha-trypsin inhibitor heavy chain H4 | ITIH4    | 0 | 0 | 0 | 0 | 6.90E-01 | -0.02 | 8.07E-01 | 2.01E-02 | 0.21  | 5.78E-02 | 2.28E-03 | 0.25  | 8.11E-03 |
| P02746     | Complement C1q subcomponent subunit B        | C1QB     | 0 | 0 | 0 | 0 | 7.81E-01 | -0.02 | 8.62E-01 | 3.62E-02 | 0.19  | 8.80E-02 | 1.80E-04 | 0.43  | 1.31E-03 |
| P02774     | Vitamin D-binding protein                    | GC       | 0 | 0 | 0 | 0 | 8.15E-01 | -0.03 | 8.74E-01 | 2.40E-01 | -0.10 | 3.49E-01 | 6.56E-01 | 0.05  | 7.51E-01 |
| P02749     | Beta-2-glycoprotein 1                        | APOH     | 0 | 0 | 0 | 0 | 4.26E-01 | -0.03 | 6.12E-01 | 8.28E-02 | -0.21 | 1.53E-01 | 7.80E-06 | -0.48 | 1.45E-04 |
| A0A075B6I9 | Ig lambda chain V region 4A                  | IGLV7-46 | 0 | 0 | 0 | 0 | 5.87E-01 | -0.04 | 7.25E-01 | 5.76E-01 | -0.22 | 7.04E-01 | 9.83E-01 | -0.02 | 9.89E-01 |
| P02787     | Serotransferrin                              | TF       | 0 | 0 | 0 | 0 | 4.37E-01 | -0.04 | 6.18E-01 | 3.51E-05 | -0.27 | 9.77E-04 | 1.23E-06 | -0.45 | 4.11E-05 |
| P01019     | Angiotensinogen                              | AGT      | 0 | 0 | 0 | 0 | 1.60E-01 | -0.04 | 3.20E-01 | 5.43E-01 | -0.09 | 6.74E-01 | 9.79E-06 | -0.68 | 1.49E-04 |
| O43196     | MutS protein homolog 5                       | MSH5     | 0 | 1 | 0 | 1 | 5.58E-01 | -0.04 | 7.00E-01 | 9.01E-02 | -0.33 | 1.55E-01 | 4.16E-01 | -0.25 | 5.26E-01 |
| P01860     | Ig gamma-3 chain C region                    | IGHG3    | 0 | 0 | 0 | 0 | 8.30E-01 | -0.05 | 8.79E-01 | 4.30E-02 | -0.19 | 9.74E-02 | 4.78E-05 | -0.62 | 4.44E-04 |
| P05090     | Apolipoprotein D                             | APOD     | 0 | 0 | 0 | 0 | 5.01E-02 | -0.05 | 1.58E-01 | 4.44E-02 | 0.11  | 9.81E-02 | 1.29E-01 | 0.18  | 2.01E-01 |
| P00747     | Plasminogen                                  | PLG      | 0 | 0 | 0 | 0 | 2.70E-01 | -0.05 | 4.64E-01 | 5.87E-01 | -0.07 | 7.13E-01 | 6.78E-02 | -0.16 | 1.29E-01 |
| P02765     | Alpha-2-HS-glycoprotein                      | AHSG     | 0 | 0 | 0 | 0 | 3.56E-01 | -0.05 | 5.42E-01 | 6.77E-05 | -0.37 | 1.28E-03 | 2.08E-03 | -0.51 | 7.57E-03 |
| P01861     | Ig gamma-4 chain C region                    | IGHG4    | 0 | 0 | 0 | 0 | 3.44E-01 | -0.06 | 5.27E-01 | 3.85E-01 | -0.12 | 5.16E-01 | 1.82E-03 | -0.52 | 6.92E-03 |
| Q96IY4     | Carboxypeptidase B2                          | CPB2     | 2 | 0 | 0 | 0 | 6.40E-01 | -0.06 | 7.80E-01 | 6.77E-01 | -0.01 | 7.83E-01 | 7.56E-01 | 0.06  | 8.41E-01 |
| P08697     | Alpha-2-antiplasmin                          | SERPINF2 | 0 | 0 | 0 | 0 | 1.71E-01 | -0.06 | 3.37E-01 | 4.38E-02 | 0.11  | 9.80E-02 | 4.32E-02 | -0.20 | 9.26E-02 |
| P08603     | Complement factor H                          | CFH      | 0 | 0 | 0 | 0 | 1.51E-01 | -0.07 | 3.06E-01 | 8.73E-01 | 0.00  | 9.27E-01 | 4.93E-02 | 0.15  | 1.00E-01 |
| P07195     | L-lactate dehydrogenase B chain              | LDHB     | 3 | 1 | 1 | 1 | 7.65E-01 | -0.07 | 8.51E-01 | 2.16E-02 | -0.70 | 6.01E-02 | 8.93E-01 | 0.03  | 9.38E-01 |
| Q14520     | Hyaluronan-binding protein 2                 | HABP2    | 0 | 0 | 0 | 0 | 7.51E-01 | -0.07 | 8.46E-01 | 1.35E-02 | 0.67  | 4.58E-02 | 9.91E-03 | 0.84  | 2.80E-02 |
| A0A0B4J1V0 |                                              | IGHV3-15 | 0 | 0 | 0 | 0 | 3.27E-01 | -0.08 | 5.10E-01 | 7.61E-03 | -0.25 | 3.15E-02 | 2.08E-03 | -0.56 | 7.57E-03 |
| P02771     | Alpha-fetoprotein                            | AFP      | 0 | 0 | 0 | 0 | 8.26E-01 | -0.08 | 8.79E-01 | 3.35E-05 | -0.80 | 9.77E-04 | 2.44E-04 | -1.36 | 1.51E-03 |
| P04004     | Vitronectin                                  | VTN      | 0 | 0 | 0 | 0 | 6.68E-02 | -0.08 | 1.88E-01 | 9.03E-01 | 0.01  | 9.47E-01 | 2.35E-02 | 0.18  | 5.52E-02 |
| P01023     | Alpha-2-macroglobulin                        | A2M      | 0 | 0 | 0 | 0 | 4.43E-03 | -0.09 | 3.28E-02 | 8.82E-01 | -0.02 | 9.31E-01 | 9.39E-01 | 0.01  | 9.68E-01 |
| P07225     | Vitamin K-dependent protein S                | PROS1    | 1 | 0 | 0 | 0 | 5.30E-01 | -0.09 | 6.89E-01 | 8.46E-03 | 0.28  | 3.43E-02 | 1.17E-02 | 0.34  | 3.01E-02 |
| P01594     | Ig kappa chain V-I region AU                 |          | 0 | 0 | 0 | 0 | 8.55E-01 | -0.09 | 8.88E-01 | 1.15E-03 | -0.33 | 6.97E-03 | 2.10E-01 | -0.29 | 2.94E-01 |
| P03952     | Plasma kallikrein                            | KLKB1    | 0 | 0 | 0 | 0 | 9.28E-02 | -0.10 | 2.33E-01 | 4.20E-01 | -0.05 | 5.49E-01 | 9.51E-01 | 0.00  | 9.69E-01 |
| P01703     | Ig lambda chain V-I region NEWM              |          | 3 | 0 | 0 | 0 | 1.41E-01 | -0.10 | 2.97E-01 | 3.15E-01 | -0.27 | 4.38E-01 | 1.92E-01 | -0.20 | 2.75E-01 |

## Supplementary Material

|            |                                               |           |    |   |   |   |          |       |          |          |       |          |          |       |          |
|------------|-----------------------------------------------|-----------|----|---|---|---|----------|-------|----------|----------|-------|----------|----------|-------|----------|
| P00748     | Coagulation factor XII                        | F12       | 0  | 0 | 0 | 1 | 6.52E-01 | -0.11 | 7.90E-01 | 1.83E-02 | -0.71 | 5.46E-02 | 4.76E-02 | 0.03  | 9.81E-02 |
| A0A075B6P5 | Ig kappa chain V-II region FR                 | IGKV2D-28 | 1  | 0 | 0 | 0 | 8.15E-01 | -0.12 | 8.74E-01 | 1.10E-01 | -0.17 | 1.83E-01 | 1.08E-01 | -0.27 | 1.76E-01 |
| P02649     | Apolipoprotein E                              | APOE      | 0  | 0 | 0 | 0 | 6.85E-01 | -0.12 | 8.07E-01 | 7.08E-01 | 0.13  | 8.07E-01 | 7.60E-01 | 0.10  | 8.41E-01 |
| A0A075B6H9 |                                               | IGLV4-69  | 12 | 4 | 2 | 5 | 4.15E-01 | -0.12 | 6.01E-01 | NA       | NA    | NA       | NA       | NA    | NA       |
| P49747     | Cartilage oligomeric matrix protein           | COMP      | 1  | 0 | 0 | 0 | 3.99E-01 | -0.13 | 5.87E-01 | 1.93E-01 | -0.30 | 2.93E-01 | 3.33E-01 | -0.15 | 4.38E-01 |
| O95445     | Apolipoprotein M                              | APOM      | 0  | 0 | 0 | 0 | 5.06E-02 | -0.13 | 1.58E-01 | 5.19E-01 | -0.11 | 6.54E-01 | 1.15E-02 | 0.37  | 3.01E-02 |
| P02751     | Fibronectin                                   | FN1       | 0  | 0 | 0 | 0 | 3.90E-01 | -0.13 | 5.78E-01 | 5.91E-01 | -0.09 | 7.13E-01 | 8.42E-02 | 0.38  | 1.48E-01 |
| O75882     | Attractin                                     | ATRIN     | 0  | 0 | 0 | 0 | 1.51E-01 | -0.14 | 3.06E-01 | 9.92E-01 | -0.02 | 9.92E-01 | 5.17E-04 | -0.44 | 2.70E-03 |
| P01700     | Ig lambda chain V-I region HA                 |           | 0  | 0 | 0 | 0 | 2.81E-01 | -0.14 | 4.76E-01 | 3.16E-04 | -0.21 | 3.36E-03 | 5.91E-03 | -0.52 | 1.83E-02 |
| Q6PL18     | ATPase family AAA domain-containing protein 2 | ATAD2     | 0  | 0 | 0 | 0 | 5.02E-01 | -0.14 | 6.77E-01 | 1.09E-03 | -0.64 | 6.84E-03 | 1.21E-03 | -0.63 | 5.19E-03 |
| P01619     | Ig kappa chain V-III region B6                |           | 0  | 0 | 0 | 0 | 2.05E-01 | -0.14 | 3.85E-01 | 1.12E-04 | -0.28 | 1.58E-03 | 3.10E-05 | -0.45 | 3.04E-04 |
| P02775     | Platelet basic protein                        | PPBP      | 0  | 0 | 0 | 0 | 4.65E-01 | -0.15 | 6.47E-01 | 2.81E-01 | -0.23 | 3.98E-01 | 8.37E-01 | 0.02  | 8.96E-01 |
| P63104     | 14-3-3 protein zeta/delta                     | YWHAZ     | 12 | 1 | 4 | 5 | 7.62E-01 | -0.15 | 8.51E-01 | NA       | NA    | NA       | NA       | NA    | NA       |
| A0A0C4DH72 |                                               | IGKV1-6   | 8  | 3 | 0 | 4 | 3.08E-01 | -0.15 | 4.90E-01 | 1.77E-02 | -0.57 | 5.43E-02 | 4.02E-01 | -0.15 | 5.18E-01 |
| P01834     | Ig kappa chain C region                       | IGKC      | 0  | 0 | 0 | 0 | 8.61E-03 | -0.15 | 5.11E-02 | 9.29E-04 | -0.27 | 6.25E-03 | 3.14E-04 | -0.33 | 1.81E-03 |
| P05155     | Plasma protease C1 inhibitor                  | SERPIN G1 | 1  | 0 | 0 | 0 | 6.82E-01 | -0.16 | 8.07E-01 | 8.45E-01 | 0.11  | 9.18E-01 | 1.77E-01 | -0.43 | 2.62E-01 |
| P02753     | Retinol-binding protein 4                     | RBP4      | 0  | 0 | 0 | 0 | 4.39E-01 | -0.16 | 6.18E-01 | 9.66E-01 | 0.00  | 9.84E-01 | 5.40E-01 | 0.11  | 6.48E-01 |
| A0A0B4J1V1 | Ig heavy chain V-III region JON               | IGHV3-21  | 0  | 0 | 0 | 0 | 9.17E-02 | -0.16 | 2.33E-01 | 4.07E-01 | -0.19 | 5.40E-01 | 7.83E-02 | -0.37 | 1.41E-01 |
| P02790     | Hemopexin                                     | HPX       | 0  | 0 | 0 | 0 | 3.87E-02 | -0.17 | 1.33E-01 | 9.96E-02 | 0.30  | 1.68E-01 | 4.39E-02 | 0.90  | 9.27E-02 |
| P02760     | Protein AMBP                                  | AMBP      | 0  | 0 | 0 | 0 | 6.04E-03 | -0.17 | 3.95E-02 | 6.31E-02 | -0.14 | 1.28E-01 | 8.31E-01 | 0.00  | 8.96E-01 |
| A0A0C4DH25 |                                               | IGKV3D-20 | 0  | 0 | 0 | 0 | 2.18E-02 | -0.17 | 9.44E-02 | 1.31E-01 | -0.14 | 2.14E-01 | 7.87E-03 | -0.60 | 2.33E-02 |
| P19827     | Inter-alpha-trypsin inhibitor heavy chain H1  | ITIH1     | 0  | 0 | 0 | 0 | 1.64E-03 | -0.18 | 1.54E-02 | 8.25E-04 | -0.27 | 5.85E-03 | 1.77E-01 | -0.10 | 2.62E-01 |
| P04433     | Ig kappa chain V-III region VG                | IGKV3D-11 | 0  | 0 | 0 | 0 | 3.09E-03 | -0.18 | 2.50E-02 | 5.04E-02 | -0.19 | 1.08E-01 | 3.67E-04 | -0.48 | 2.04E-03 |
| P10909     | Clusterin                                     | CLU       | 0  | 0 | 0 | 0 | 2.03E-01 | -0.20 | 3.85E-01 | 6.72E-01 | 0.08  | 7.83E-01 | 1.30E-02 | 0.37  | 3.29E-02 |
| P01602     | Ig kappa chain V-I region HK102               | IGKV1-5   | 0  | 0 | 0 | 0 | 1.19E-01 | -0.20 | 2.71E-01 | 9.50E-03 | -0.26 | 3.75E-02 | 1.61E-01 | -0.33 | 2.44E-01 |
| Q8TD57     | Dynein heavy chain 3, axonemal                | DNAH3     | 5  | 2 | 2 | 2 | 3.67E-02 | -0.20 | 1.28E-01 | 2.51E-02 | -0.15 | 6.89E-02 | 2.03E-02 | -0.62 | 4.85E-02 |
| P23142     | Fibulin-1                                     | FBLN1     | 0  | 0 | 0 | 0 | 4.84E-03 | -0.20 | 3.44E-02 | 7.08E-04 | -0.26 | 5.47E-03 | 7.38E-02 | -0.25 | 1.34E-01 |
| O43866     | CD5 antigen-like                              | CD5L      | 2  | 1 | 0 | 0 | 2.68E-01 | -0.21 | 4.64E-01 | 6.61E-01 | -0.13 | 7.80E-01 | 7.54E-06 | 1.55  | 1.45E-04 |

|             |                                              |          |    |   |   |   |          |       |          |          |       |          |          |       |          |
|-------------|----------------------------------------------|----------|----|---|---|---|----------|-------|----------|----------|-------|----------|----------|-------|----------|
| P01704      | Ig lambda chain V-II region TOG              |          | 3  | 1 | 0 | 1 | 6.81E-01 | -0.22 | 8.07E-01 | 6.00E-01 | -0.05 | 7.18E-01 | 7.69E-01 | -0.06 | 8.45E-01 |
| P0DP01      | Ig heavy chain V-I region HG3                | IGHV1-3  | 0  | 0 | 0 | 0 | 3.27E-02 | -0.24 | 1.24E-01 | 4.19E-02 | -0.28 | 9.74E-02 | 8.19E-04 | -0.60 | 4.10E-03 |
| P01624      | Ig kappa chain V-III region POM              |          | 0  | 0 | 0 | 0 | 3.56E-04 | -0.26 | 6.33E-03 | 8.31E-02 | -0.17 | 1.53E-01 | 2.16E-04 | -0.48 | 1.43E-03 |
| P01857      | Ig gamma-1 chain C region                    | IGHG1    | 0  | 0 | 0 | 0 | 2.68E-03 | -0.26 | 2.27E-02 | 1.39E-03 | -0.23 | 7.36E-03 | 3.86E-04 | -0.42 | 2.08E-03 |
| P00746      | Complement factor D                          | CFD      | 2  | 0 | 0 | 1 | 1.34E-01 | -0.27 | 2.87E-01 | 2.65E-02 | -0.28 | 6.94E-02 | 5.00E-02 | -0.33 | 1.01E-01 |
| P01871      | Ig mu chain C region                         | IGHM     | 0  | 0 | 0 | 0 | 7.44E-03 | -0.27 | 4.57E-02 | 6.60E-02 | 0.17  | 1.30E-01 | 5.36E-08 | 1.55  | 8.94E-06 |
| P49913      | Cathelicidin antimicrobial peptide           | CAMP     | 0  | 0 | 0 | 0 | 4.41E-01 | -0.27 | 6.18E-01 | 1.93E-01 | -0.30 | 2.93E-01 | 9.31E-04 | -0.53 | 4.17E-03 |
| P01701      | Ig lambda chain V-I region NEW               |          | 0  | 0 | 0 | 0 | 6.05E-02 | -0.28 | 1.76E-01 | 1.10E-02 | -0.29 | 4.08E-02 | 6.97E-02 | -0.26 | 1.29E-01 |
| P19823      | Inter-alpha-trypsin inhibitor heavy chain H2 | ITIH2    | 0  | 0 | 0 | 0 | 6.27E-04 | -0.30 | 1.01E-02 | 1.20E-03 | -0.23 | 7.06E-03 | 2.35E-01 | -0.11 | 3.24E-01 |
| P01709      | Ig lambda chain V-II region MGC              |          | 0  | 0 | 0 | 0 | 1.42E-03 | -0.30 | 1.54E-02 | 8.70E-02 | -0.28 | 1.53E-01 | 5.91E-01 | -0.12 | 6.95E-01 |
| P43652      | Afamin                                       | AFM      | 0  | 0 | 0 | 0 | 6.06E-03 | -0.30 | 3.95E-02 | 1.25E-03 | -0.37 | 7.07E-03 | 5.34E-03 | -0.55 | 1.71E-02 |
| A0A0C4D H31 |                                              | IGHV1-18 | 0  | 0 | 0 | 0 | 1.76E-02 | -0.30 | 8.49E-02 | 3.15E-02 | -0.20 | 7.99E-02 | 8.79E-05 | -0.57 | 6.99E-04 |
| P07437      | Tubulin beta chain                           | TUBB     | 9  | 4 | 6 | 5 | 3.08E-01 | -0.31 | 4.90E-01 | NA       | NA    | NA       | NA       | NA    | NA       |
| B9A064      | Immunoglobulin lambda-like polypeptide 5     | IGLL5    | 0  | 0 | 0 | 0 | 1.60E-03 | -0.31 | 1.54E-02 | 2.61E-02 | -0.15 | 6.94E-02 | 6.04E-03 | -0.57 | 1.83E-02 |
| P04275      | von Willebrand factor                        | VWF      | 0  | 0 | 0 | 0 | 3.01E-01 | -0.32 | 4.87E-01 | 7.95E-04 | -1.15 | 5.85E-03 | 6.97E-02 | -0.56 | 1.29E-01 |
| O75636      | Ficolin-3                                    | FCN3     | 2  | 0 | 0 | 1 | 5.00E-01 | -0.34 | 6.77E-01 | 8.60E-02 | -0.82 | 1.53E-01 | 1.09E-02 | -0.90 | 2.94E-02 |
| Q96PD5      | N-acetylmuramoyl-L-alanine amidase           | PGLYRP2  | 0  | 0 | 0 | 0 | 7.08E-05 | -0.34 | 2.99E-03 | 5.72E-02 | -0.29 | 1.22E-01 | 4.55E-01 | -0.08 | 5.67E-01 |
| A0M8Q6      | Ig lambda-7 chain C region                   | IGLC7    | 8  | 3 | 3 | 5 | 2.81E-02 | -0.37 | 1.11E-01 | 6.34E-02 | -0.18 | 1.28E-01 | NA       | NA    | NA       |
| Q04756      | Hepatocyte growth factor activator           | HGFAC    | 3  | 0 | 1 | 0 | 4.32E-02 | -0.37 | 1.42E-01 | 7.92E-01 | -0.08 | 8.86E-01 | 5.48E-01 | 0.09  | 6.50E-01 |
| P08519      | Apolipoprotein(a)                            | LPA      | 0  | 1 | 0 | 1 | 1.87E-01 | -0.38 | 3.60E-01 | 1.89E-01 | 0.55  | 2.92E-01 | 1.03E-02 | 1.28  | 2.87E-02 |
| P23083      | Ig heavy chain V-I region V35                |          | 0  | 0 | 0 | 0 | 3.47E-02 | -0.39 | 1.28E-01 | 5.58E-03 | -0.45 | 2.37E-02 | 1.93E-01 | -0.27 | 2.75E-01 |
| A0A0B4J1 X5 |                                              | IGHV3-74 | 1  | 0 | 2 | 1 | 1.76E-02 | -0.41 | 8.49E-02 | 8.02E-02 | -0.21 | 1.53E-01 | 1.05E-01 | -0.38 | 1.75E-01 |
| P01034      | Cystatin-C                                   | CST3     | 4  | 1 | 3 | 1 | 1.23E-02 | -0.41 | 6.61E-02 | 8.12E-02 | -0.27 | 1.53E-01 | 5.15E-02 | -0.36 | 1.02E-01 |
| P02452      | Collagen alpha-1(I) chain                    | COL1A1   | 1  | 3 | 0 | 0 | 1.19E-02 | -0.42 | 6.61E-02 | 2.19E-01 | -0.10 | 3.26E-01 | 4.19E-02 | 0.34  | 9.21E-02 |
| P60709      | Actin, cytoplasmic 1                         | ACTB     | 0  | 0 | 0 | 0 | 2.05E-02 | -0.42 | 9.13E-02 | 9.36E-01 | -0.04 | 9.64E-01 | 1.94E-01 | -0.23 | 2.75E-01 |
| A0A0B4J1 U7 |                                              | IGHV6-1  | 1  | 1 | 0 | 0 | 3.61E-02 | -0.42 | 1.28E-01 | 2.57E-01 | -0.31 | 3.67E-01 | 1.27E-01 | -0.49 | 2.00E-01 |
| Q15485      | Ficolin-2                                    | FCN2     | 12 | 2 | 2 | 4 | 1.10E-01 | -0.49 | 2.58E-01 | 8.34E-01 | -0.02 | 9.18E-01 | 1.03E-01 | -0.35 | 1.74E-01 |

|             |                                              |            |    |   |   |    |          |       |          |          |       |          |          |       |          |
|-------------|----------------------------------------------|------------|----|---|---|----|----------|-------|----------|----------|-------|----------|----------|-------|----------|
| Q08380      | Galectin-3-binding protein                   | LGALS3 BP  | 0  | 3 | 6 | 0  | 6.90E-02 | -0.49 | 1.89E-01 | NA       | NA    | NA       | 4.26E-01 | 0.24  | 5.35E-01 |
| P04406      | Glyceraldehyde-3-phosphate dehydrogenase     | GAPDH      | 16 | 5 | 4 | 7  | 5.49E-02 | -0.52 | 1.69E-01 | NA       | NA    | NA       | NA       | NA    | NA       |
| P27169      | Serum paraoxonase/aryles terase 1            | PON1       | 1  | 1 | 0 | 0  | 1.46E-01 | -0.53 | 3.01E-01 | 9.63E-01 | -0.03 | 9.84E-01 | 1.87E-01 | -0.29 | 2.74E-01 |
| A0A075B6 J9 |                                              | IGLV2-18   | 7  | 1 | 5 | 6  | 2.85E-01 | -0.54 | 4.76E-01 | NA       | NA    | NA       | NA       | NA    | NA       |
| P02788      | Lactotransferrin                             | LTF        | 0  | 0 | 0 | 0  | 5.68E-02 | -0.55 | 1.71E-01 | 1.75E-01 | -0.35 | 2.76E-01 | 4.31E-03 | 0.50  | 1.44E-02 |
| P05106      | Integrin beta-3                              | ITGB3      | 11 | 3 | 6 | 4  | 1.18E-01 | -0.55 | 2.71E-01 | NA       | NA    | NA       | 4.45E-02 | -0.28 | 9.29E-02 |
| P21333      | Filamin-A                                    | FLNA       | 4  | 0 | 1 | 1  | 1.34E-01 | -0.66 | 2.87E-01 | 8.40E-01 | 0.09  | 9.18E-01 | 7.20E-01 | -0.16 | 8.07E-01 |
| P62937      | Peptidyl-prolyl cis-trans isomerase A        | PPIA       | 13 | 1 | 7 | 8  | 3.68E-02 | -0.79 | 1.28E-01 | NA       | NA    | NA       | NA       | NA    | NA       |
| P69892      | Hemoglobin subunit gamma-2                   | HBG2       | 0  | 0 | 0 | 0  | 6.03E-02 | -0.81 | 1.76E-01 | 9.90E-01 | -0.07 | 9.92E-01 | 4.76E-01 | -0.26 | 5.88E-01 |
| P68871      | Hemoglobin subunit beta                      | HBB        | 0  | 0 | 0 | 0  | 9.67E-02 | -0.90 | 2.36E-01 | 5.71E-01 | 0.23  | 7.03E-01 | 9.79E-01 | -0.05 | 9.89E-01 |
| P69905      | Hemoglobin subunit alpha                     | HBA1       | 0  | 0 | 0 | 0  | 7.26E-02 | -0.91 | 1.93E-01 | 8.35E-01 | 0.08  | 9.18E-01 | 9.05E-01 | -0.02 | 9.45E-01 |
| Q99879      | Histone H2B type 1-M                         | HIST1H2 BM | 11 | 3 | 7 | 10 | 4.32E-02 | -0.93 | 1.42E-01 | NA       | NA    | NA       | NA       | NA    | NA       |
| P10720      | Platelet factor 4 variant                    | PF4V1      | 2  | 1 | 1 | 1  | 2.66E-02 | -0.95 | 1.10E-01 | 2.29E-01 | 0.33  | 3.39E-01 | 2.80E-02 | -0.66 | 6.32E-02 |
| P35443      | Thrombospondin-4                             | THBS4      | 4  | 3 | 3 | 2  | 1.61E-03 | -0.99 | 1.54E-02 | 8.90E-02 | -0.41 | 1.54E-01 | 1.13E-01 | -0.41 | 1.83E-01 |
| P69891      | Hemoglobin subunit gamma-1                   | HBG1       | 1  | 0 | 1 | 0  | 3.05E-02 | -1.21 | 1.18E-01 | 4.28E-02 | 0.39  | 9.74E-02 | 1.58E-01 | -0.65 | 2.42E-01 |
| P59666      | Neutrophil defensin 3                        | DEFA3      | 0  | 0 | 0 | 0  | 8.65E-02 | -1.25 | 2.26E-01 | 8.49E-02 | -0.79 | 1.53E-01 | 1.15E-02 | -1.31 | 3.01E-02 |
| Q99878      | Histone H2A type 1-J                         | HIST1H2 AJ | 6  | 1 | 5 | 6  | 1.52E-02 | -1.47 | 7.74E-02 | NA       | NA    | NA       | NA       | NA    | NA       |
| P30043      | Flavin reductase (NADPH)                     | BLVRB      | 3  | 0 | 2 | 1  | 1.32E-02 | -2.24 | 6.90E-02 | 6.28E-02 | 0.87  | 1.28E-01 | 9.30E-01 | -0.11 | 9.65E-01 |
| P16112      | Aggrecan core protein                        | ACAN       | 13 | 4 | 6 | 6  | NA       | NA    | NA       | NA       | NA    | NA       | NA       | NA    | NA       |
| Q9HDC9      | Adipocyte plasma membrane-associated protein | APMAP      | 15 | 4 | 3 | 5  | NA       | NA    | NA       | 1.08E-02 | 0.75  | 4.08E-02 | NA       | NA    | NA       |
| P02745      | Complement C1q subcomponent subunit A        | C1QA       | 19 | 9 | 4 | 5  | NA       | NA    | NA       | NA       | NA    | NA       | NA       | NA    | NA       |
| P02458      | Collagen alpha-1(II) chain                   | COL2A1     | 25 | 4 | 7 | 7  | NA       | NA    | NA       | NA       | NA    | NA       | NA       | NA    | NA       |
| P22792      | Carboxypeptidase N subunit 2                 | CPN2       | 18 | 5 | 4 | 4  | NA       | NA    | NA       | 3.41E-01 | -0.14 | 4.68E-01 | NA       | NA    | NA       |
| P12259      | Coagulation factor V                         | F5         | 15 | 9 | 3 | 4  | NA       | NA    | NA       | 2.07E-02 | 0.73  | 5.88E-02 | NA       | NA    | NA       |
| P00740      | Coagulation factor IX                        | F9         | 11 | 6 | 5 | 4  | NA       | NA    | NA       | NA       | NA    | NA       | 6.17E-01 | 0.05  | 7.16E-01 |

|            |                                                 |           |    |   |    |    |    |    |    |          |       |          |          |       |          |    |
|------------|-------------------------------------------------|-----------|----|---|----|----|----|----|----|----------|-------|----------|----------|-------|----------|----|
| B1AL88     | Transmembrane protein FAM155A                   | FAM155A   | 20 | 4 | 5  | 7  | NA | NA | NA | NA       | NA    | NA       | NA       | NA    | NA       | NA |
| P01876     | Ig alpha-1 chain C region                       | IGHA1     | 12 | 8 | 8  | 10 | NA | NA | NA | NA       | NA    | NA       | NA       | NA    | NA       | NA |
| A0A0A0MS15 |                                                 | IGHV3-49  | 19 | 9 | 9  | 4  | NA | NA | NA | NA       | NA    | NA       | NA       | NA    | NA       | NA |
| P0DP09     |                                                 | IGKV1D-13 | 13 | 8 | 6  | 3  | NA | NA | NA | NA       | NA    | NA       | 1.73E-01 | -0.47 | 2.60E-01 |    |
| P15814     | Immunoglobulin lambda-like polypeptide 1        | IGLL1     | 13 | 5 | 5  | 6  | NA | NA | NA | NA       | NA    | NA       | NA       | NA    | NA       | NA |
| Q7LBC6     | Lysine-specific demethylase 3B                  | KDM3B     | 22 | 4 | 10 | 8  | NA | NA | NA | NA       | NA    | NA       | NA       | NA    | NA       | NA |
| P48740     | Mannan-binding lectin serine protease 1         | MASP1     | 14 | 6 | 6  | 4  | NA | NA | NA | NA       | NA    | NA       | NA       | NA    | NA       | NA |
| P14618     | Pyruvate kinase PKM                             | PKM       | 12 | 8 | 4  | 7  | NA | NA | NA | 6.77E-01 | -0.08 | 7.83E-01 | NA       | NA    | NA       | NA |
| P49908     | Selenoprotein P                                 | SEPP1     | 16 | 8 | 1  | 5  | NA | NA | NA | 4.81E-02 | -0.09 | 1.05E-01 | NA       | NA    | NA       | NA |
| A6NMB1     | Sialic acid-binding Ig-like lectin 16           | SIGLEC16  | 9  | 1 | 2  | 4  | NA | NA | NA | 8.53E-02 | 0.26  | 1.53E-01 | 1.06E-02 | 0.54  | 2.90E-02 |    |
| Q96RL7     | Vacuolar protein sorting-associated protein 13A | VPS13A    | 14 | 6 | 4  | 4  | NA | NA | NA | 1.80E-01 | -0.29 | 2.80E-01 | NA       | NA    | NA       | NA |
| P01705     | Ig lambda chain V-II region NEI                 |           | 15 | 5 | 4  | 7  | NA | NA | NA | NA       | NA    | NA       | NA       | NA    | NA       | NA |

**Supplementary Table 7.** All proteins in the main cohort sorted by DOL1 fold change. FC: log<sub>2</sub>(DOLX vs DOL0 fold change difference)

| UPID   | Protein names                       | GN       | missing values |      |      |      | DOL1 vs DOL0 |      |          | DOL3 vs DOL0 |       |          | DOL7 vs DOL0 |       |          |
|--------|-------------------------------------|----------|----------------|------|------|------|--------------|------|----------|--------------|-------|----------|--------------|-------|----------|
|        |                                     |          | DOL0           | DOL1 | DOL3 | DOL7 | p-value      | FC   | q-value  | p-value      | FC    | q-value  | p-value      | FC    | q-value  |
| P00738 | Haptoglobin                         | HP       | 0              | 0    | 0    | 0    | 6.11E-04     | 3.17 | 1.25E-02 | 2.06E-02     | 2.56  | 7.22E-02 | 2.39E-03     | 2.23  | 7.96E-03 |
| P0DJ19 | Serum amyloid A-2 protein           | SAA2     | 4              | 0    | 5    | 6    | 1.66E-02     | 2.22 | 7.74E-02 | NA           | NA    | NA       | NA           | NA    | NA       |
| P0DJ18 | Serum amyloid A-1 protein           | SAA1     | 2              | 0    | 1    | 5    | 5.06E-02     | 1.87 | 1.50E-01 | 1.14E-02     | -4.81 | 4.90E-02 | NA           | NA    | NA       |
| P02679 | Fibrinogen gamma chain              | FGG      | 0              | 0    | 0    | 0    | 7.58E-02     | 1.86 | 1.90E-01 | 8.61E-02     | 0.28  | 1.68E-01 | 9.42E-02     | 0.33  | 1.42E-01 |
| P02675 | Fibrinogen beta chain               | FGB      | 0              | 0    | 0    | 0    | 6.31E-02     | 1.79 | 1.70E-01 | 8.81E-02     | 0.38  | 1.68E-01 | 1.79E-01     | 0.22  | 2.38E-01 |
| P02671 | Fibrinogen alpha chain              | FGA      | 0              | 0    | 0    | 0    | 4.35E-02     | 1.73 | 1.41E-01 | 4.85E-01     | 0.28  | 5.68E-01 | 1.65E-02     | 0.46  | 3.38E-02 |
| P02748 | Complement component C9             | C9       | 3              | 0    | 0    | 0    | 1.93E-03     | 1.39 | 2.69E-02 | 2.84E-01     | 0.81  | 3.97E-01 | 1.17E-01     | 1.23  | 1.73E-01 |
| P04003 | C4b-binding protein alpha chain     | C4BPA    | 0              | 0    | 0    | 0    | 4.38E-02     | 0.98 | 1.41E-01 | 9.57E-02     | 1.02  | 1.75E-01 | 1.15E-04     | 1.40  | 1.04E-03 |
| O75636 | Ficolin-3                           | FCN3     | 0              | 0    | 0    | 0    | 5.53E-03     | 0.85 | 5.23E-02 | 3.51E-01     | -0.42 | 4.61E-01 | 1.42E-01     | -0.48 | 1.99E-01 |
| P02743 | Serum amyloid P-component           | APCS     | 0              | 0    | 1    | 1    | 6.34E-02     | 0.70 | 1.70E-01 | 2.24E-02     | 0.54  | 7.25E-02 | 7.40E-01     | -0.19 | 8.06E-01 |
| P07225 | Vitamin K-dependent protein S       | PROS1    | 0              | 0    | 1    | 0    | 2.19E-03     | 0.64 | 2.69E-02 | 3.58E-02     | 0.35  | 9.31E-02 | 1.86E-03     | 0.83  | 6.42E-03 |
| P02763 | Alpha-1-acid glycoprotein 1         | ORM1     | 0              | 0    | 0    | 0    | 5.74E-04     | 0.61 | 1.25E-02 | 1.86E-01     | 0.56  | 2.98E-01 | 2.87E-02     | 0.68  | 5.18E-02 |
| P07357 | Complement component C8 alpha chain | C8A      | 0              | 0    | 0    | 0    | 1.70E-02     | 0.60 | 7.74E-02 | 7.72E-03     | 1.38  | 3.72E-02 | 1.26E-04     | 1.02  | 1.04E-03 |
| P04114 | Apolipoprotein B-100                | APOB     | 0              | 0    | 0    | 0    | 1.64E-01     | 0.53 | 3.10E-01 | 9.82E-04     | 1.11  | 1.06E-02 | 9.58E-07     | 1.50  | 3.86E-05 |
| P02656 | Apolipoprotein C-III                | APOC3    | 0              | 0    | 0    | 0    | 9.04E-02     | 0.46 | 2.15E-01 | 7.19E-04     | 1.40  | 9.08E-03 | 3.23E-04     | 1.11  | 1.87E-03 |
| P09871 | Complement C1s subcomponent         | C1S      | 0              | 0    | 0    | 0    | 2.67E-05     | 0.40 | 1.64E-03 | 7.62E-03     | 0.40  | 3.72E-02 | 3.04E-03     | 0.36  | 9.30E-03 |
| P04196 | Histidine-rich glycoprotein         | HRG      | 0              | 0    | 0    | 0    | 2.91E-01     | 0.38 | 4.41E-01 | 1.12E-04     | 2.64  | 5.19E-03 | 1.93E-02     | 1.49  | 3.71E-02 |
| P00751 | Complement factor B                 | CFB      | 0              | 0    | 0    | 0    | 1.30E-04     | 0.37 | 5.32E-03 | 3.41E-03     | 0.58  | 2.22E-02 | 9.15E-07     | 0.76  | 3.86E-05 |
| P01011 | Alpha-1-antichymotrypsin            | SERPINA3 | 5              | 0    | 1    | 1    | 3.22E-04     | 0.37 | 9.89E-03 | NA           | NA    | NA       | NA           | NA    | NA       |
| P19652 | Alpha-1-acid glycoprotein 2         | ORM2     | 0              | 0    | 0    | 0    | 5.42E-02     | 0.37 | 1.51E-01 | 3.73E-01     | 0.45  | 4.80E-01 | 3.55E-04     | 1.07  | 1.93E-03 |
| P35542 | Serum amyloid A-4 protein           | SAA4     | 0              | 0    | 0    | 0    | 3.75E-01     | 0.34 | 5.30E-01 | 5.67E-01     | 0.49  | 6.34E-01 | 4.57E-01     | 0.62  | 5.55E-01 |
| P05090 | Apolipoprotein D                    | APOD     | 0              | 0    | 0    | 0    | 1.07E-01     | 0.29 | 2.40E-01 | 5.77E-04     | 0.46  | 8.34E-03 | 1.03E-02     | 0.29  | 2.35E-02 |
| P01042 | Kininogen-1                         | KNG1     | 0              | 0    | 0    | 0    | 2.48E-01     | 0.29 | 3.91E-01 | 3.01E-01     | 0.16  | 4.08E-01 | 7.39E-02     | 0.33  | 1.19E-01 |

|        |                                              |       |   |   |   |   |          |      |          |          |       |          |          |       |          |
|--------|----------------------------------------------|-------|---|---|---|---|----------|------|----------|----------|-------|----------|----------|-------|----------|
| P07358 | Complement component C8 beta chain           | C8B   | 0 | 0 | 0 | 0 | 2.41E-01 | 0.29 | 3.90E-01 | 1.68E-02 | 0.83  | 6.24E-02 | 4.31E-08 | 1.05  | 5.22E-06 |
| P00748 | Coagulation factor XII                       | F12   | 0 | 0 | 0 | 0 | 2.36E-01 | 0.29 | 3.90E-01 | 7.65E-01 | 0.02  | 8.22E-01 | 5.21E-01 | -0.32 | 6.17E-01 |
| P00450 | Ceruloplasmin                                | CP    | 0 | 0 | 0 | 0 | 2.00E-03 | 0.28 | 2.69E-02 | 4.09E-03 | 0.38  | 2.53E-02 | 5.91E-03 | 0.53  | 1.59E-02 |
| Q03591 | Complement factor H-related protein 1        | CFHR1 | 1 | 1 | 1 | 2 | 2.02E-01 | 0.26 | 3.65E-01 | 6.89E-02 | 0.67  | 1.47E-01 | NA       | NA    | NA       |
| P13671 | Complement component C6                      | C6    | 0 | 0 | 0 | 0 | 4.62E-02 | 0.24 | 1.42E-01 | 8.47E-01 | 0.13  | 8.86E-01 | 5.37E-02 | 0.23  | 9.02E-02 |
| P02747 | Complement C1q subcomponent subunit C        | C1QC  | 0 | 0 | 0 | 0 | 7.53E-03 | 0.21 | 5.23E-02 | 2.82E-03 | 0.59  | 2.04E-02 | 1.36E-03 | 0.60  | 5.02E-03 |
| P26927 | Hepatocyte growth factor-like protein        | MST1  | 2 | 0 | 0 | 3 | 4.50E-01 | 0.21 | 5.95E-01 | 2.14E-01 | -0.32 | 3.19E-01 | NA       | NA    | NA       |
| O14791 | Apolipoprotein L1                            | APOL1 | 5 | 0 | 0 | 0 | 1.15E-01 | 0.19 | 2.53E-01 | 1.43E-01 | 0.62  | 2.47E-01 | NA       | NA    | NA       |
| P01031 | Complement C5                                | C5    | 0 | 0 | 0 | 0 | 1.67E-01 | 0.17 | 3.11E-01 | 2.40E-02 | 0.41  | 7.25E-02 | 9.24E-03 | 0.47  | 2.19E-02 |
| P0DOY3 |                                              |       | 0 | 0 | 0 | 1 | 9.76E-01 | 0.17 | 9.79E-01 | 7.90E-02 | -0.22 | 1.58E-01 | 1.51E-01 | 0.81  | 2.10E-01 |
| P00736 | Complement C1r subcomponent                  | C1R   | 0 | 0 | 0 | 0 | 5.29E-01 | 0.17 | 6.79E-01 | 2.44E-01 | 0.29  | 3.48E-01 | 8.09E-03 | 0.45  | 2.00E-02 |
| P03952 | Plasma kallikrein                            | KLKB1 | 2 | 0 | 0 | 0 | 4.26E-01 | 0.16 | 5.76E-01 | 5.21E-03 | 0.43  | 2.94E-02 | 6.80E-01 | 0.32  | 7.62E-01 |
| P02746 | Complement C1q subcomponent subunit B        | C1QB  | 0 | 0 | 0 | 0 | 2.43E-01 | 0.16 | 3.90E-01 | 3.83E-02 | 0.16  | 9.77E-02 | 2.20E-01 | 0.44  | 2.86E-01 |
| P01766 | Ig heavy chain V-III region BRO              |       | 2 | 1 | 0 | 2 | 9.79E-01 | 0.15 | 9.79E-01 | 1.52E-01 | -0.28 | 2.60E-01 | NA       | NA    | NA       |
| P0C0L5 | Complement C4-B                              | C4B   | 0 | 0 | 0 | 0 | 2.15E-02 | 0.14 | 9.13E-02 | 2.92E-02 | 0.41  | 7.90E-02 | 1.55E-04 | 0.59  | 1.10E-03 |
| P01019 | Angiotensinogen                              | AGT   | 0 | 0 | 0 | 0 | 3.93E-01 | 0.12 | 5.44E-01 | 1.20E-04 | -0.33 | 5.19E-03 | 5.64E-04 | -0.47 | 2.63E-03 |
| P22792 | Carboxypeptidase N subunit 2                 | CPN2  | 0 | 0 | 0 | 1 | 5.02E-01 | 0.12 | 6.57E-01 | 3.31E-02 | 0.45  | 8.78E-02 | 1.35E-01 | -0.10 | 1.92E-01 |
| P02766 | Transthyretin                                | TTR   | 0 | 0 | 0 | 0 | 7.29E-01 | 0.12 | 8.08E-01 | 2.16E-01 | -0.96 | 3.19E-01 | 1.80E-02 | -0.96 | 3.57E-02 |
| Q14624 | Inter-alpha-trypsin inhibitor heavy chain H4 | ITIH4 | 0 | 0 | 0 | 0 | 8.29E-02 | 0.12 | 2.04E-01 | 2.83E-02 | -0.16 | 7.84E-02 | 1.30E-02 | 0.16  | 2.85E-02 |
| P05156 | Complement factor I                          | CFI   | 0 | 0 | 0 | 0 | 8.05E-01 | 0.12 | 8.61E-01 | 1.85E-01 | 0.22  | 2.98E-01 | 4.59E-01 | 0.05  | 5.55E-01 |
| P01700 | Ig lambda chain V-I region HA                |       | 0 | 0 | 0 | 0 | 7.97E-01 | 0.11 | 8.61E-01 | 3.01E-01 | -0.16 | 4.08E-01 | 2.03E-01 | -0.05 | 2.67E-01 |
| Q06033 | Inter-alpha-trypsin inhibitor heavy chain H3 | ITIH3 | 0 | 0 | 0 | 0 | 2.30E-01 | 0.10 | 3.90E-01 | 1.18E-03 | 0.84  | 1.13E-02 | 6.04E-01 | 0.11  | 6.83E-01 |
| P10909 | Clusterin                                    | CLU   | 0 | 0 | 0 | 0 | 7.99E-01 | 0.08 | 8.61E-01 | 6.49E-02 | 0.54  | 1.44E-01 | 7.53E-01 | 0.40  | 8.14E-01 |
| P00734 | Prothrombin                                  | F2    | 0 | 0 | 0 | 0 | 5.79E-01 | 0.07 | 7.19E-01 | 3.66E-01 | -0.03 | 4.76E-01 | 3.07E-03 | 0.23  | 9.30E-03 |
| P15169 | Carboxypeptidase N catalytic chain           | CPN1  | 0 | 1 | 0 | 0 | 6.38E-01 | 0.07 | 7.47E-01 | 6.59E-02 | 0.09  | 1.44E-01 | 9.41E-01 | 0.11  | 9.55E-01 |
| P02647 | Apolipoprotein A-I                           | APOA1 | 0 | 0 | 0 | 0 | 7.05E-01 | 0.06 | 7.96E-01 | 5.38E-01 | 0.00  | 6.08E-01 | 2.71E-04 | 0.83  | 1.73E-03 |
| Q16610 | Extracellular matrix protein 1               | ECM1  | 3 | 0 | 1 | 0 | 9.59E-01 | 0.04 | 9.74E-01 | 9.09E-03 | -0.32 | 4.07E-02 | 1.62E-02 | 0.14  | 3.38E-02 |
| P10643 | Complement component C7                      | C7    | 0 | 0 | 0 | 0 | 3.19E-01 | 0.04 | 4.73E-01 | 5.75E-03 | -0.35 | 3.11E-02 | 7.90E-03 | -0.47 | 1.99E-02 |

## Supplementary Material

|            |                                                             |           |   |   |   |   |          |       |          |          |       |          |          |       |          |
|------------|-------------------------------------------------------------|-----------|---|---|---|---|----------|-------|----------|----------|-------|----------|----------|-------|----------|
| P01024     | Complement C3                                               | C3        | 0 | 0 | 0 | 0 | 3.92E-01 | 0.03  | 5.44E-01 | 1.65E-01 | 0.11  | 2.76E-01 | 6.85E-02 | 0.16  | 1.12E-01 |
| P27918     | Properdin                                                   | CFP       | 1 | 0 | 0 | 1 | 2.67E-01 | 0.02  | 4.10E-01 | 1.72E-01 | -0.35 | 2.83E-01 | 4.84E-01 | -0.49 | 5.80E-01 |
| P02790     | Hemopexin                                                   | HPX       | 0 | 0 | 0 | 0 | 8.73E-01 | 0.01  | 9.10E-01 | 2.07E-01 | 0.37  | 3.12E-01 | 2.66E-02 | 0.76  | 4.87E-02 |
| P00747     | Plasminogen                                                 | PLG       | 0 | 0 | 0 | 0 | 6.33E-01 | 0.00  | 7.47E-01 | 3.77E-01 | -0.05 | 4.80E-01 | 8.25E-01 | 0.03  | 8.84E-01 |
| P23142     | Fibulin-1                                                   | FBLN1     | 0 | 0 | 0 | 0 | 8.38E-01 | -0.02 | 8.89E-01 | 3.16E-03 | -0.52 | 2.17E-02 | 5.81E-01 | -0.16 | 6.63E-01 |
| P02753     | Retinol-binding protein 4                                   | RBP4      | 0 | 0 | 0 | 0 | 8.82E-01 | -0.02 | 9.11E-01 | 9.16E-02 | 0.52  | 1.72E-01 | 2.75E-01 | 0.26  | 3.51E-01 |
| P08697     | Alpha-2-antiplasmin                                         | SERPINF2  | 0 | 0 | 0 | 0 | 6.78E-01 | -0.03 | 7.73E-01 | 4.74E-04 | 0.28  | 8.34E-03 | 9.61E-02 | 0.00  | 1.44E-01 |
| P02649     | Apolipoprotein E                                            | APOE      | 0 | 0 | 0 | 0 | 8.64E-01 | -0.04 | 9.09E-01 | 2.75E-03 | 0.60  | 2.04E-02 | 9.03E-01 | 0.16  | 9.34E-01 |
| P04004     | Vitronectin                                                 | VTN       | 0 | 0 | 0 | 0 | 7.19E-01 | -0.04 | 8.04E-01 | 8.56E-01 | -0.06 | 8.86E-01 | 1.72E-02 | 0.39  | 3.47E-02 |
| P02749     | Beta-2-glycoprotein 1                                       | APOH      | 0 | 0 | 0 | 0 | 5.61E-01 | -0.05 | 7.12E-01 | 1.79E-03 | -0.06 | 1.47E-02 | 8.10E-02 | -0.11 | 1.27E-01 |
| P36955     | Pigment epithelium-derived factor                           | SERPINF1  | 1 | 0 | 1 | 0 | 9.57E-01 | -0.06 | 9.74E-01 | 6.17E-01 | -0.14 | 6.74E-01 | 3.55E-01 | -0.10 | 4.43E-01 |
| P02652     | Apolipoprotein A-II                                         | APOA2     | 0 | 0 | 0 | 0 | 2.56E-02 | -0.07 | 1.02E-01 | 2.13E-02 | 0.21  | 7.25E-02 | 8.86E-02 | 0.38  | 1.37E-01 |
| P01859     | Ig gamma-2 chain C region                                   | IGHG2     | 0 | 0 | 0 | 0 | 6.65E-01 | -0.07 | 7.66E-01 | 4.63E-03 | -0.32 | 2.73E-02 | 8.44E-01 | -0.29 | 8.96E-01 |
| P04433     | Ig kappa chain V-III region VG                              | IGKV3D-11 | 0 | 0 | 0 | 0 | 6.15E-01 | -0.07 | 7.41E-01 | 4.21E-04 | -0.39 | 8.34E-03 | 1.08E-03 | -0.33 | 4.36E-03 |
| Q2M296     | Methenyltetrahydrofolate synthase domain-containing protein | MTHFSD    | 2 | 0 | 1 | 1 | 4.45E-02 | -0.07 | 1.41E-01 | 2.05E-01 | -0.23 | 3.12E-01 | 6.87E-02 | -0.10 | 1.12E-01 |
| P01834     | Ig kappa chain C region                                     | IGKC      | 0 | 0 | 0 | 0 | 1.24E-01 | -0.08 | 2.67E-01 | 2.54E-02 | -0.37 | 7.37E-02 | 1.92E-06 | -0.50 | 5.80E-05 |
| P08603     | Complement factor H                                         | CFH       | 0 | 0 | 0 | 0 | 4.55E-03 | -0.08 | 5.09E-02 | 3.27E-01 | -0.07 | 4.34E-01 | 1.28E-04 | 0.27  | 1.04E-03 |
| O95445     | Apolipoprotein M                                            | APOM      | 0 | 0 | 0 | 0 | 3.57E-01 | -0.08 | 5.11E-01 | 1.22E-03 | 0.49  | 1.13E-02 | 5.78E-05 | 0.64  | 7.44E-04 |
| P01009     | Alpha-1-antitrypsin                                         | SERPINA1  | 0 | 0 | 0 | 0 | 5.78E-01 | -0.09 | 7.19E-01 | 5.14E-02 | -0.43 | 1.22E-01 | 9.36E-01 | -0.12 | 9.55E-01 |
| P25311     | Zinc-alpha-2-glycoprotein                                   | AZGP1     | 0 | 0 | 0 | 0 | 6.34E-01 | -0.09 | 7.47E-01 | 5.98E-02 | 0.28  | 1.39E-01 | 6.34E-04 | -0.17 | 2.84E-03 |
| P02774     | Vitamin D-binding protein                                   | GC        | 0 | 0 | 0 | 0 | 9.08E-02 | -0.09 | 2.15E-01 | 8.34E-01 | 0.06  | 8.81E-01 | 5.41E-01 | 0.09  | 6.30E-01 |
| P02768     | Serum albumin                                               | ALB       | 0 | 0 | 0 | 0 | 1.21E-02 | -0.10 | 6.78E-02 | 7.61E-03 | -0.10 | 3.72E-02 | 3.14E-05 | -0.32 | 4.75E-04 |
| P01008     | Antithrombin-III                                            | SERPINC1  | 0 | 0 | 0 | 0 | 2.19E-01 | -0.10 | 3.84E-01 | 4.95E-01 | -0.13 | 5.73E-01 | 7.75E-02 | 0.02  | 1.23E-01 |
| P0DP01     | Ig heavy chain V-I region HG3                               | IGHV1-3   | 0 | 0 | 0 | 0 | 1.39E-01 | -0.11 | 2.84E-01 | 7.68E-04 | -0.37 | 9.08E-03 | 1.92E-02 | -0.55 | 3.71E-02 |
| A0A0C4DH25 |                                                             | IGKV3D-20 | 0 | 0 | 1 | 0 | 6.67E-01 | -0.13 | 7.66E-01 | 1.17E-02 | -0.47 | 4.90E-02 | 1.65E-02 | -0.31 | 3.38E-02 |
| P0DOY2     |                                                             |           | 0 | 0 | 0 | 0 | 1.41E-01 | -0.13 | 2.84E-01 | 8.60E-03 | -0.54 | 3.99E-02 | 1.83E-03 | -0.32 | 6.42E-03 |
| P0DP04     |                                                             |           | 2 | 1 | 2 | 2 | 5.30E-01 | -0.14 | 6.79E-01 | NA       | NA    | NA       | NA       | NA    | NA       |
| P01023     | Alpha-2-macroglobulin                                       | A2M       | 0 | 0 | 0 | 0 | 2.31E-01 | -0.15 | 3.90E-01 | 9.35E-01 | 0.00  | 9.50E-01 | 7.09E-01 | 0.08  | 7.80E-01 |
| P01871     | Ig mu chain C region                                        | IGHM      | 0 | 0 | 0 | 0 | 1.55E-01 | -0.15 | 2.98E-01 | 3.98E-01 | 0.18  | 4.84E-01 | 2.14E-05 | 1.05  | 3.70E-04 |
| P02765     | Alpha-2-HS-glycoprotein                                     | AHSG      | 0 | 0 | 0 | 0 | 2.44E-01 | -0.16 | 3.90E-01 | 2.32E-02 | -0.49 | 7.25E-02 | 1.23E-01 | -0.32 | 1.79E-01 |



|             |                                                       |           |   |   |   |   |          |       |          |          |       |          |          |       |          |
|-------------|-------------------------------------------------------|-----------|---|---|---|---|----------|-------|----------|----------|-------|----------|----------|-------|----------|
| P04217      | Alpha-1B-glycoprotein                                 | A1BG      | 0 | 0 | 0 | 0 | 2.26E-05 | -0.16 | 1.64E-03 | 1.95E-01 | -0.10 | 3.01E-01 | 1.31E-03 | 0.14  | 5.02E-03 |
| P01624      | Ig kappa chain V-III region POM                       |           | 0 | 0 | 0 | 0 | 1.05E-02 | -0.17 | 6.30E-02 | 8.76E-02 | -0.44 | 1.68E-01 | 1.41E-05 | -0.39 | 2.85E-04 |
| B9A064      | Immunoglobulin lambda-like polypeptide 5              | IGLL5     | 0 | 0 | 0 | 0 | 1.43E-01 | -0.18 | 2.84E-01 | 4.70E-01 | -0.17 | 5.56E-01 | 8.43E-04 | -0.52 | 3.52E-03 |
| P06396      | Gelsolin                                              | GSN       | 0 | 0 | 0 | 0 | 3.07E-01 | -0.19 | 4.60E-01 | 6.47E-02 | -0.30 | 1.44E-01 | 4.94E-03 | -0.26 | 1.40E-02 |
| P02787      | Serotransferrin                                       | TF        | 0 | 0 | 0 | 0 | 1.61E-02 | -0.19 | 7.74E-02 | 7.18E-02 | -0.14 | 1.51E-01 | 2.94E-03 | -0.31 | 9.30E-03 |
| P80748      | Ig lambda chain V-III region LOI                      | IGLV3-9   | 0 | 0 | 0 | 0 | 6.75E-02 | -0.19 | 1.73E-01 | 2.79E-01 | -0.31 | 3.95E-01 | 1.31E-04 | -0.46 | 1.04E-03 |
| A0A0B4J1 V0 |                                                       | IGHV3-15  | 0 | 0 | 0 | 0 | 1.43E-01 | -0.20 | 2.84E-01 | 3.93E-01 | -0.23 | 4.84E-01 | 2.43E-03 | -0.37 | 7.96E-03 |
| A0A075B6 P5 | Ig kappa chain V-II region FR                         | IGKV2D-28 | 0 | 0 | 0 | 0 | 5.46E-03 | -0.20 | 5.23E-02 | 7.66E-02 | -0.33 | 1.56E-01 | 5.25E-04 | -0.49 | 2.54E-03 |
| P01857      | Ig gamma-1 chain C region                             | IGHG1     | 0 | 0 | 0 | 0 | 2.59E-01 | -0.21 | 4.03E-01 | 9.27E-02 | -0.41 | 1.72E-01 | 3.89E-04 | -0.69 | 1.96E-03 |
| A0A075B6 K4 |                                                       | IGLV3-10  | 1 | 0 | 0 | 0 | 2.27E-01 | -0.21 | 3.90E-01 | 4.32E-02 | -0.28 | 1.08E-01 | 2.97E-02 | -0.87 | 5.29E-02 |
| P19827      | Inter-alpha-trypsin inhibitor heavy chain H1          | ITIH1     | 0 | 0 | 0 | 0 | 4.46E-02 | -0.21 | 1.41E-01 | 6.36E-01 | -0.06 | 6.89E-01 | 9.81E-01 | 0.07  | 9.81E-01 |
| Q96PD5      | N-acetylmuramoyl-L-alanine amidase                    | PGLYRP2   | 0 | 0 | 1 | 0 | 1.27E-02 | -0.22 | 6.80E-02 | 7.89E-01 | 0.17  | 8.41E-01 | 8.90E-01 | 0.25  | 9.28E-01 |
| P01861      | Ig gamma-4 chain C region                             | IGHG4     | 0 | 0 | 0 | 0 | 6.26E-03 | -0.23 | 5.23E-02 | 5.34E-04 | -0.37 | 8.34E-03 | 1.37E-03 | -0.29 | 5.02E-03 |
| P01860      | Ig gamma-3 chain C region                             | IGHG3     | 0 | 0 | 0 | 0 | 2.93E-02 | -0.23 | 1.09E-01 | 1.37E-02 | -0.44 | 5.40E-02 | 4.01E-03 | -0.43 | 1.18E-02 |
| P10720      | Platelet factor 4 variant                             | PF4V1     | 4 | 1 | 2 | 2 | 5.87E-01 | -0.24 | 7.22E-01 | NA       | NA    | NA       | NA       | NA    | NA       |
| P01619      | Ig kappa chain V-III region B6                        |           | 0 | 0 | 0 | 0 | 1.63E-02 | -0.26 | 7.74E-02 | 7.68E-02 | -0.58 | 1.56E-01 | 1.20E-02 | -0.40 | 2.69E-02 |
| P02751      | Fibronectin                                           | FN1       | 0 | 0 | 0 | 0 | 2.03E-02 | -0.27 | 8.93E-02 | 1.90E-01 | -0.15 | 3.00E-01 | 3.67E-04 | 0.41  | 1.93E-03 |
| P43652      | Afamin                                                | AFM       | 0 | 0 | 0 | 0 | 1.06E-01 | -0.29 | 2.40E-01 | 5.90E-01 | 0.04  | 6.50E-01 | 2.58E-02 | -0.48 | 4.80E-02 |
| A0A0C4D H31 |                                                       | IGHV1-18  | 1 | 0 | 1 | 1 | 5.13E-02 | -0.29 | 1.50E-01 | 5.16E-02 | -0.60 | 1.22E-01 | 9.68E-03 | -0.74 | 2.25E-02 |
| P06310      | Ig kappa chain V-II region RPMI 6410                  | IGKV2D-30 | 0 | 0 | 0 | 0 | 2.66E-02 | -0.30 | 1.02E-01 | 1.09E-01 | -0.51 | 1.98E-01 | 3.25E-04 | -0.40 | 1.87E-03 |
| P02760      | Protein AMBP                                          | AMBP      | 0 | 0 | 0 | 0 | 7.13E-03 | -0.30 | 5.23E-02 | 2.29E-02 | -0.38 | 7.25E-02 | 5.93E-03 | 0.10  | 1.59E-02 |
| P01602      | Ig kappa chain V-I region HK102                       | IGKV1-5   | 2 | 0 | 0 | 1 | 1.57E-03 | -0.33 | 2.69E-02 | 4.98E-01 | -0.23 | 5.73E-01 | 7.42E-05 | -0.56 | 8.16E-04 |
| Q15582      | Transforming growth factor-beta-induced protein ig-h3 | TGFBI     | 0 | 0 | 1 | 0 | 9.58E-02 | -0.35 | 2.22E-01 | 1.78E-02 | -0.29 | 6.44E-02 | 5.38E-01 | -0.15 | 6.30E-01 |
| P01034      | Cystatin-C                                            | CST3      | 1 | 1 | 1 | 2 | 5.25E-02 | -0.40 | 1.50E-01 | 5.71E-01 | 0.13  | 6.34E-01 | NA       | NA    | NA       |
| P19823      | Inter-alpha-trypsin inhibitor heavy chain H2          | ITIH2     | 0 | 0 | 0 | 0 | 1.04E-02 | -0.42 | 6.30E-02 | 2.55E-02 | -0.27 | 7.37E-02 | 9.47E-01 | 0.07  | 9.55E-01 |
| P02775      | Platelet basic protein                                | PPBP      | 0 | 0 | 0 | 0 | 4.02E-01 | -0.43 | 5.49E-01 | 2.88E-01 | -0.17 | 3.98E-01 | 1.56E-02 | -0.59 | 3.36E-02 |

## Supplementary Material

|             |                                               |          |    |   |   |   |          |       |          |          |       |          |          |       |          |
|-------------|-----------------------------------------------|----------|----|---|---|---|----------|-------|----------|----------|-------|----------|----------|-------|----------|
| A0A0B4J1 V1 | Ig heavy chain V-III region JON               | IGHV3-21 | 0  | 0 | 0 | 0 | 1.08E-02 | -0.46 | 6.30E-02 | 3.87E-01 | 0.18  | 4.84E-01 | 2.39E-02 | -0.36 | 4.52E-02 |
| P02771      | Alpha-fetoprotein                             | AFP      | 0  | 0 | 0 | 0 | 3.63E-02 | -0.46 | 1.31E-01 | 2.72E-02 | -0.54 | 7.68E-02 | 1.38E-04 | -1.30 | 1.04E-03 |
| P01594      | Ig kappa chain V-I region AU                  |          | 1  | 0 | 0 | 0 | 1.39E-01 | -0.46 | 2.84E-01 | 8.76E-05 | -0.55 | 5.19E-03 | 3.52E-02 | -0.41 | 6.17E-02 |
| P04275      | von Willebrand factor                         | VWF      | 0  | 0 | 0 | 0 | 7.56E-03 | -0.47 | 5.23E-02 | 5.46E-04 | -0.88 | 8.34E-03 | 1.68E-01 | -0.82 | 2.26E-01 |
| P69891      | Hemoglobin subunit gamma-1                    | HBG1     | 1  | 0 | 1 | 2 | 5.96E-01 | -0.51 | 7.26E-01 | 3.98E-01 | 1.19  | 4.84E-01 | NA       | NA    | NA       |
| P01705      | Ig lambda chain V-II region NEI               |          | 5  | 1 | 0 | 0 | 7.66E-03 | -0.56 | 5.23E-02 | NA       | NA    | NA       | 3.98E-02 | -0.49 | 6.79E-02 |
| P27169      | Serum paraoxonase/aryles terase 1             | PON1     | 0  | 0 | 0 | 0 | 6.75E-02 | -0.62 | 1.73E-01 | 3.97E-01 | -0.05 | 4.84E-01 | 6.91E-01 | 0.09  | 7.67E-01 |
| P60709      | Actin, cytoplasmic 1                          | ACTB     | 0  | 0 | 0 | 0 | 1.89E-01 | -0.70 | 3.46E-01 | 9.84E-01 | 0.24  | 9.84E-01 | 4.99E-03 | -1.20 | 1.40E-02 |
| P04040      | Catalase                                      | CAT      | 4  | 1 | 0 | 2 | 7.48E-01 | -0.79 | 8.21E-01 | NA       | NA    | NA       | NA       | NA    | NA       |
| P69905      | Hemoglobin subunit alpha                      | HBA1     | 0  | 0 | 0 | 0 | 3.53E-01 | -0.93 | 5.11E-01 | 4.61E-01 | 0.91  | 5.50E-01 | 3.00E-01 | -0.29 | 3.78E-01 |
| P69892      | Hemoglobin subunit gamma-2                    | HBG2     | 0  | 0 | 0 | 0 | 4.33E-01 | -0.94 | 5.79E-01 | 4.54E-01 | 0.84  | 5.46E-01 | 4.45E-01 | -0.35 | 5.50E-01 |
| P62328      | Thymosin beta-4                               | TMSB4X   | 0  | 0 | 0 | 0 | 3.30E-01 | -0.98 | 4.84E-01 | 1.63E-01 | -0.69 | 2.76E-01 | 1.31E-01 | -1.19 | 1.89E-01 |
| P59666      | Neutrophil defensin 3                         | DEFA3    | 0  | 1 | 0 | 1 | 3.79E-02 | -1.06 | 1.33E-01 | 1.53E-02 | -1.31 | 5.84E-02 | 6.71E-04 | -2.92 | 2.90E-03 |
| P21333      | Filamin-A                                     | FLNA     | 0  | 0 | 1 | 1 | 2.66E-02 | -1.28 | 1.02E-01 | 8.59E-01 | 0.15  | 8.86E-01 | 1.57E-01 | -1.08 | 2.14E-01 |
| P68871      | Hemoglobin subunit beta                       | HBB      | 0  | 0 | 0 | 0 | 2.07E-01 | -1.38 | 3.68E-01 | 5.34E-01 | 0.82  | 6.08E-01 | 5.67E-01 | -0.35 | 6.54E-01 |
| P32119      | Peroxiredoxin-2                               | PRDX2    | 1  | 0 | 2 | 2 | 1.54E-01 | -1.73 | 2.98E-01 | NA       | NA    | NA       | NA       | NA    | NA       |
| Q9HDC9      | Adipocyte plasma membrane-associated protein  | APMAP    | 6  | 1 | 1 | 1 | NA       | NA    | NA       | 1.36E-02 | 0.53  | 5.40E-02 | NA       | NA    | NA       |
| P59998      | Actin-related protein 2/3 complex subunit 4   | ARPC4    | 7  | 2 | 4 | 1 | NA       | NA    | NA       | NA       | NA    | NA       | NA       | NA    | NA       |
| Q6PL18      | ATPase family AAA domain-containing protein 2 | ATAD2    | 5  | 1 | 3 | 3 | NA       | NA    | NA       | NA       | NA    | NA       | NA       | NA    | NA       |
| O75882      | Attractin                                     | ATRIN    | 4  | 0 | 0 | 3 | NA       | NA    | NA       | 9.65E-01 | 0.11  | 9.72E-01 | NA       | NA    | NA       |
| P30043      | Flavin reductase (NADPH)                      | BLVRB    | 2  | 2 | 2 | 3 | NA       | NA    | NA       | NA       | NA    | NA       | NA       | NA    | NA       |
| P02745      | Complement C1q subcomponent subunit A         | C1QA     | 11 | 2 | 6 | 4 | NA       | NA    | NA       | NA       | NA    | NA       | NA       | NA    | NA       |
| P06681      | Complement C2                                 | C2       | 3  | 0 | 0 | 0 | NA       | NA    | NA       | 9.09E-01 | 0.01  | 9.31E-01 | 8.92E-02 | 0.29  | 1.37E-01 |
| P07360      | Complement component C8 gamma chain           | C8G      | 9  | 1 | 3 | 2 | NA       | NA    | NA       | NA       | NA    | NA       | NA       | NA    | NA       |
| P00915      | Carbonic anhydrase 1                          | CA1      | 10 | 3 | 2 | 4 | NA       | NA    | NA       | NA       | NA    | NA       | NA       | NA    | NA       |
| O43866      | CD5 antigen-like                              | CD5L     | 6  | 3 | 1 | 0 | NA       | NA    | NA       | NA       | NA    | NA       | 1.16E-05 | 0.98  | 2.81E-04 |

|            |                                              |           |    |   |   |   |    |    |    |          |       |          |          |       |          |
|------------|----------------------------------------------|-----------|----|---|---|---|----|----|----|----------|-------|----------|----------|-------|----------|
| P00746     | Complement factor D                          | CFD       | 9  | 3 | 2 | 2 | NA | NA | NA | NA       | NA    | NA       | NA       | NA    | NA       |
| P36980     | Complement factor H-related protein 2        | CFHR2     | 6  | 0 | 0 | 4 | NA | NA | NA | 3.23E-01 | 0.39  | 4.32E-01 | NA       | NA    | NA       |
| P02452     | Collagen alpha-1(I) chain                    | COL1A1    | 5  | 2 | 0 | 1 | NA | NA | NA | 2.44E-01 | 0.20  | 3.48E-01 | 8.72E-03 | 0.56  | 2.11E-02 |
| P31146     | Coronin-1A                                   | CORO1A    | 10 | 4 | 3 | 3 | NA | NA | NA | NA       | NA    | NA       | NA       | NA    | NA       |
| P12259     | Coagulation factor V                         | F5        | 8  | 3 | 2 | 1 | NA | NA | NA | NA       | NA    | NA       | NA       | NA    | NA       |
| P00740     | Coagulation factor IX                        | F9        | 5  | 1 | 0 | 2 | NA | NA | NA | NA       | NA    | NA       | NA       | NA    | NA       |
| P04406     | Glyceraldehyde-3-phosphate dehydrogenase     | GAPDH     | 8  | 3 | 3 | 4 | NA | NA | NA | NA       | NA    | NA       | NA       | NA    | NA       |
| Q14520     | Hyaluronan-binding protein 2                 | HABP2     | 3  | 0 | 0 | 0 | NA | NA | NA | 2.40E-02 | 0.64  | 7.25E-02 | 6.14E-05 | 0.97  | 7.44E-04 |
| P02042     | Hemoglobin subunit delta                     | HBD       | 10 | 4 | 3 | 5 | NA | NA | NA | NA       | NA    | NA       | NA       | NA    | NA       |
| Q99878     | Histone H2A type 1-J                         | HIST1H2AJ | 7  | 3 | 5 | 4 | NA | NA | NA | NA       | NA    | NA       | NA       | NA    | NA       |
| P62805     | Histone H4                                   | HIST1H4A  | 4  | 2 | 3 | 5 | NA | NA | NA | NA       | NA    | NA       | NA       | NA    | NA       |
| P18065     | Insulin-like growth factor-binding protein 2 | IGFBP2    | 9  | 2 | 3 | 5 | NA | NA | NA | NA       | NA    | NA       | NA       | NA    | NA       |
| P01772     | Ig heavy chain V-III region KOL              | IGHV3-66  | 7  | 5 | 3 | 3 | NA | NA | NA | NA       | NA    | NA       | NA       | NA    | NA       |
| A0A0B4J1X5 |                                              | IGHV3-74  | 4  | 3 | 1 | 3 | NA | NA | NA | 1.20E-01 | -0.47 | 2.10E-01 | NA       | NA    | NA       |
| A0A0B4J1U7 |                                              | IGHV6-1   | 11 | 5 | 5 | 2 | NA | NA | NA | NA       | NA    | NA       | NA       | NA    | NA       |
| P01591     | Immunoglobulin J chain                       | IGJ       | 5  | 1 | 0 | 1 | NA | NA | NA | NA       | NA    | NA       | 1.67E-04 | 0.87  | 1.12E-03 |
| A0A0C4DH72 |                                              | IGKV1-6   | 4  | 1 | 0 | 2 | NA | NA | NA | 1.14E-01 | -0.23 | 2.03E-01 | NA       | NA    | NA       |
| A0A075B6I4 |                                              | IGLV10-54 | 4  | 1 | 0 | 2 | NA | NA | NA | 4.99E-02 | -0.65 | 1.22E-01 | NA       | NA    | NA       |
| A0A075B6K0 |                                              | IGLV3-16  | 6  | 1 | 1 | 1 | NA | NA | NA | NA       | NA    | NA       | 7.36E-03 | -1.25 | 1.89E-02 |
| A0A075B6H9 |                                              | IGLV4-69  | 10 | 1 | 4 | 2 | NA | NA | NA | NA       | NA    | NA       | NA       | NA    | NA       |
| A0A075B6I9 | Ig lambda chain V region 4A                  | IGLV7-46  | 7  | 1 | 1 | 3 | NA | NA | NA | NA       | NA    | NA       | NA       | NA    | NA       |
| A0A075B6I0 |                                              | IGLV8-61  | 8  | 3 | 3 | 0 | NA | NA | NA | NA       | NA    | NA       | 8.63E-01 | 0.44  | 9.08E-01 |
| P07195     | L-lactate dehydrogenase B chain              | LDHB      | 6  | 4 | 2 | 5 | NA | NA | NA | NA       | NA    | NA       | NA       | NA    | NA       |
| P48357     | Leptin receptor                              | LEPR      | 7  | 2 | 1 | 1 | NA | NA | NA | 2.22E-01 | -0.18 | 3.24E-01 | NA       | NA    | NA       |
| P08519     | Apolipoprotein(a)                            | LPA       | 9  | 3 | 2 | 0 | NA | NA | NA | NA       | NA    | NA       | NA       | NA    | NA       |

|        |                                                  |           |    |   |   |   |    |    |    |          |       |          |          |       |          |
|--------|--------------------------------------------------|-----------|----|---|---|---|----|----|----|----------|-------|----------|----------|-------|----------|
| P02750 | Leucine-rich alpha-2-glycoprotein                | LRG1      | 5  | 2 | 1 | 5 | NA | NA | NA | 1.91E-01 | 0.89  | 3.00E-01 | NA       | NA    | NA       |
| P02788 | Lactotransferrin                                 | LTF       | 4  | 4 | 3 | 5 | NA | NA | NA | NA       | NA    | NA       | NA       | NA    | NA       |
| O43196 | MutS protein homolog 5                           | MSH5      | 9  | 4 | 4 | 4 | NA | NA | NA | NA       | NA    | NA       | NA       | NA    | NA       |
| Q6UXB8 | Peptidase inhibitor 16                           | PI16      | 3  | 2 | 0 | 1 | NA | NA | NA | 4.32E-04 | -0.84 | 8.34E-03 | 1.54E-01 | -0.19 | 2.11E-01 |
| P62937 | Peptidyl-prolyl cis-trans isomerase A            | PPIA      | 9  | 2 | 5 | 6 | NA | NA | NA | NA       | NA    | NA       | NA       | NA    | NA       |
| P21453 | Sphingosine 1-phosphate receptor 1               | S1PR1     | 6  | 0 | 2 | 2 | NA | NA | NA | NA       | NA    | NA       | NA       | NA    | NA       |
| P05546 | Heparin cofactor 2                               | SERPIN D1 | 12 | 4 | 3 | 5 | NA | NA | NA | NA       | NA    | NA       | NA       | NA    | NA       |
| P05155 | Plasma protease C1 inhibitor                     | SERPIN G1 | 6  | 2 | 1 | 0 | NA | NA | NA | 1.81E-03 | 0.55  | 1.47E-02 | 6.72E-03 | 0.55  | 1.77E-02 |
| P02730 | Band 3 anion transport protein                   | SLC4A1    | 7  | 2 | 3 | 5 | NA | NA | NA | NA       | NA    | NA       | NA       | NA    | NA       |
| P02549 | Spectrin alpha chain, erythrocytic 1             | SPTA1     | 13 | 4 | 2 | 3 | NA | NA | NA | NA       | NA    | NA       | NA       | NA    | NA       |
| Q9H254 | Spectrin beta chain, non-erythrocytic 4          | SPTBN4    | 13 | 5 | 3 | 5 | NA | NA | NA | NA       | NA    | NA       | NA       | NA    | NA       |
| P49755 | Transmembrane emp24 domain-containing protein 10 | TMED10    | 9  | 2 | 4 | 3 | NA | NA | NA | NA       | NA    | NA       | NA       | NA    | NA       |
| P63104 | 14-3-3 protein zeta/delta                        | YWHAZ     | 2  | 2 | 2 | 2 | NA | NA | NA | NA       | NA    | NA       | NA       | NA    | NA       |
| P01701 | Ig lambda chain V-I region NEW                   |           | 3  | 1 | 1 | 1 | NA | NA | NA | 6.65E-02 | 1.07  | 1.44E-01 | 2.37E-01 | -0.06 | 3.05E-01 |
| P01703 | Ig lambda chain V-I region NEWM                  |           | 4  | 1 | 0 | 0 | NA | NA | NA | NA       | NA    | NA       | 3.87E-02 | -0.27 | 6.69E-02 |
| P01704 | Ig lambda chain V-II region TOG                  |           | 5  | 3 | 2 | 2 | NA | NA | NA | NA       | NA    | NA       | NA       | NA    | NA       |
| P01706 | Ig lambda chain V-II region BOH                  |           | 10 | 5 | 2 | 2 | NA | NA | NA | NA       | NA    | NA       | NA       | NA    | NA       |
| P01709 | Ig lambda chain V-II region MGC                  |           | 6  | 1 | 1 | 3 | NA | NA | NA | NA       | NA    | NA       | NA       | NA    | NA       |
| P01714 | Ig lambda chain V-III region SH                  |           | 8  | 3 | 2 | 2 | NA | NA | NA | NA       | NA    | NA       | NA       | NA    | NA       |

**Supplementary Table 8.** All proteins in the validation cohort sorted by DOL1 fold change. FC:  $\log_2(\text{DOLX vs DOL0 fold change difference})$

| Feature        | DOL1 vs DOL0    |                | DOL3 vs DOL0    |                | DOL7 vs DOL0    |                |
|----------------|-----------------|----------------|-----------------|----------------|-----------------|----------------|
|                | <i>Log2(FC)</i> | <i>q-value</i> | <i>Log2(FC)</i> | <i>q-value</i> | <i>Log2(FC)</i> | <i>q-value</i> |
| Cortisol lipid | -1.01           | 4.83E-01       | -2.36           | 1.91E-02       | -4.53           | 1.35E-04       |
| IL-6           | -0.38           | 4.25E-01       | -1.98           | 1.52E-02       | -1.98           | 8.70E-02       |
| IL-10          | -2.19           | 3.67E-01       | -2.29           | 4.55E-02       | -2.28           | 2.47E-02       |

**Supplementary Table 9.** Levels of cortisol lipid in the main cohort, as determined by metabolomics, and interleukin (IL) 6 and 10 as determined by a Cytokine Human Magnetic Panel bead array. FC: median fold-change difference relative to DOL0.

| Protein Name                    | GN       | DOL1          | DOL3   | DOL7          | Protein Level | UPID   |
|---------------------------------|----------|---------------|--------|---------------|---------------|--------|
| Alpha-2-macroglobulin           | A2M      | -9.8%         | 0.0%   | 5.8%          |               | P01023 |
| C4b-binding protein alpha chain | C4BPA    | 97.6%         | 102.9% | 163.3%        |               | P04003 |
| Complement C1q subcomponent B   | C1QB     | 11.5%         | 12.1%  | 35.8%         |               | P02746 |
| Complement C1q subcomponent C   | C1QC     | 15.9%         | 50.4%  | <b>51.8%</b>  |               | P02747 |
| Complement C1r subcomponent     | C1R      | 12.1%         | 22.4%  | 36.9%         |               | P00736 |
| Complement C1s subcomponent     | C1S      | <b>32.2%</b>  | 31.6%  | <b>28.4%</b>  |               | P09871 |
| Complement C2                   | C2       |               | 0.4%   | 22.5%         |               | P06681 |
| Complement C3                   | C3       | 2.4%          | 7.7%   | 12.1%         |               | P01024 |
| Complement C4-B                 | C4B      | 10.2%         | 33.1%  | 50.4%         |               | POCOL5 |
| Complement C5                   | C5       | 12.6%         | 33.3%  | 38.7%         |               | P01031 |
| Complement component C6         | C6       | 17.8%         | 9.5%   | 17.4%         |               | P13671 |
| Complement component C7         | C7       | 2.7%          | -21.3% | <b>-27.8%</b> |               | P10643 |
| Complement component C8 alpha   | C8A      | 52.0%         | 160.8% | <b>102.7%</b> |               | P07357 |
| Complement component C8 beta    | C8B      | 22.5%         | 77.8%  | 107.1%        |               | P07358 |
| Complement component C9         | C9       | <b>162.3%</b> | 75.4%  | 134.5%        |               | P02748 |
| Complement factor B             | CFB      | <b>29.4%</b>  | 49.0%  | <b>69.3%</b>  |               | P00751 |
| Complement factor H             | CFH      | -5.4%         | -5.1%  | 20.8%         |               | P08603 |
| Complement factor I             | CFI      | 8.6%          | 16.8%  | 3.3%          |               | P05156 |
| Ficolin-3                       | FCN3     | 79.7%         | -25.3% | -28.1%        |               | O75636 |
| Plasma protease C1 inhibitor    | SERPING1 |               | 46.8%  | <b>46.9%</b>  |               | P05155 |
| Properdin                       | CFP      | 1.6%          | -21.5% | -28.9%        |               | P27918 |
| Prothrombin                     | F2       | 5.2%          | -2.2%  | 17.7%         |               | P00734 |
| Vitamin K-dependent protein S   | PROS1    | <b>56.2%</b>  | 27.3%  | 78.1%         |               | P07225 |

**Supplementary Table 10.** Change of central complement system proteins in the validation cohort, at DOL-1, 3, and 7, relative to at birth (DOL0), i.e. 0% equals no change. Grey italic: p-value > 0.05, black: p-value < 0.05, black bold: q-value < 0.05. Trend marker red(blue): positive(negative) change compared to DOL0 (black).
